# Supplementary material for: Components of genetic associations across 2,138 phenotypes in the UK Biobank highlight adipocyte biology
Source: PubMed Central journal article supplement (PMC6731283; doi:10.1038/s41467-019-11953-9), 2019-09-06
Supplement: 41467_2019_11953_MOESM1_ESM.pdf [file 41467_2019_11953_MOESM1_ESM.pdf]

## Supplementary Information

Components of genetic associations across 2,138 phenotypes in the UK Biobank highlight adipocyte biology

Tanigawa et al.

## Supplementary Figures

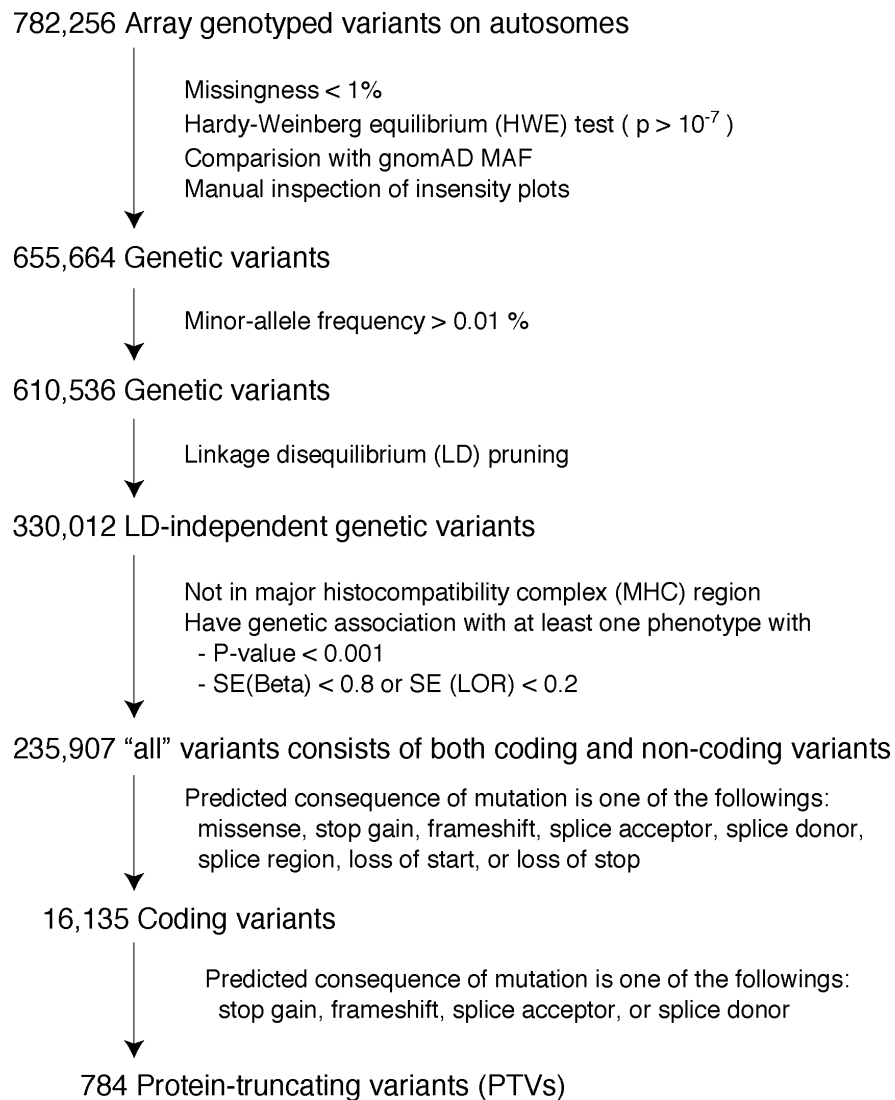

**Supplementary Fig. 1. Illustrative summary of the variant filters used in the study.** The last three variant sets ("all" variants, coding variants, and PTVs) are used in the study. SE: standard error. LOR: log odds ratio.

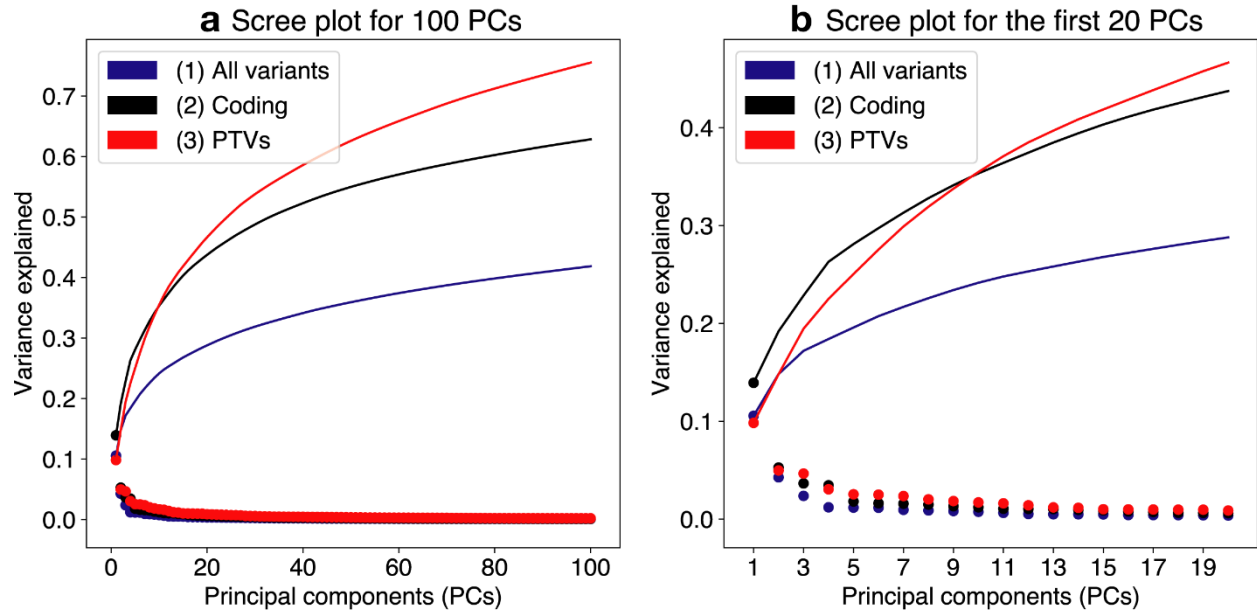

**Supplementary Fig. 2. Scree plot from the decomposition of summary statistics.** Scree plots summarize variance explained in each of the top 100 (a) and 20 (b) components. The scree plots are shown for three datasets consists of LD-pruned and QC-filtered sets of array-genotyped variants outside of MHC region: (1) all array-genotyped variants, which includes coding and non-coding variants (blue), (2) coding variants (black), and (3) protein-truncating variants (PTVs, red). For each component, we calculate the variance explained defined as squared eigenvalues divided by the total variance in the original matrix (Methods). We plotted those values as dots and cumulative values as lines.

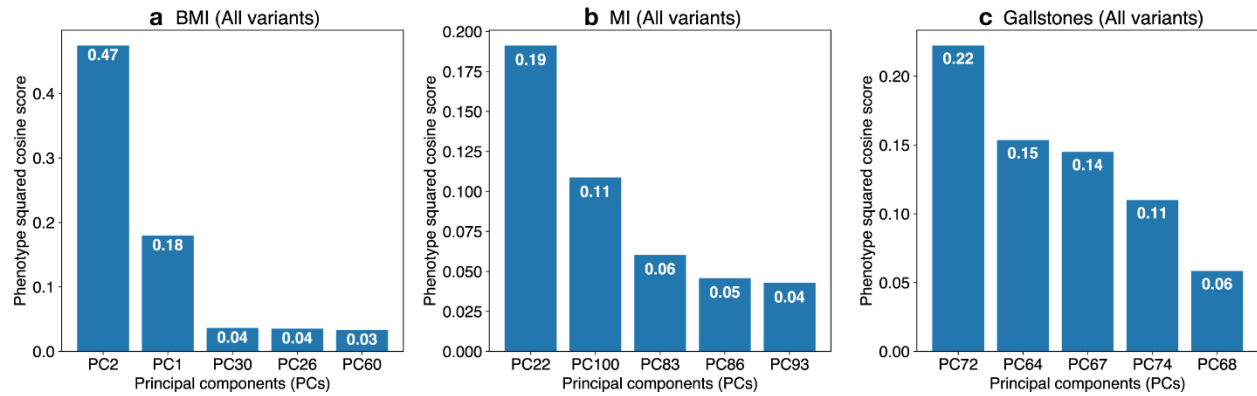

**Supplementary Fig. 3. Identification of the key components using “all” dataset.** Squared cosine score quantifies relative importance of the key components for a given phenotype. The top five key components are identified for all variant dataset that includes both coding and non-coding variants for three phenotypes: **a** body mass index (BMI), **b** myocardial infarction (MI), and **c** gallstones. The top five key components are shown on the horizontal axis and the corresponding squared cosine scores are shown on the vertical axis.

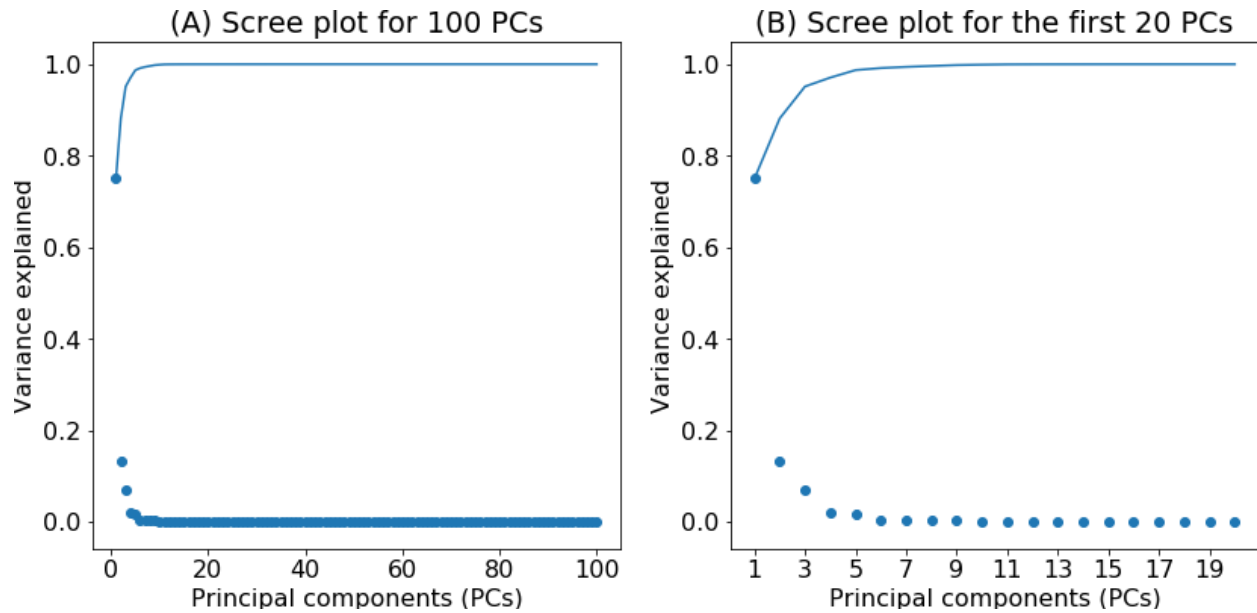

**Supplementary Fig. 4. Scree plot from the decomposition of phenotype data.** Scree plot summarizes variance explained in the top 100 (a) and 20 (b) components characterized from the imputed and normalized phenotype data. We calculate the variance explained defined as squared eigenvalues divided by the total variance in the original matrix (Methods). We plotted those values as dots and cumulative values as lines.

**a** Phenotype PCA plot of the phenotype TSVD

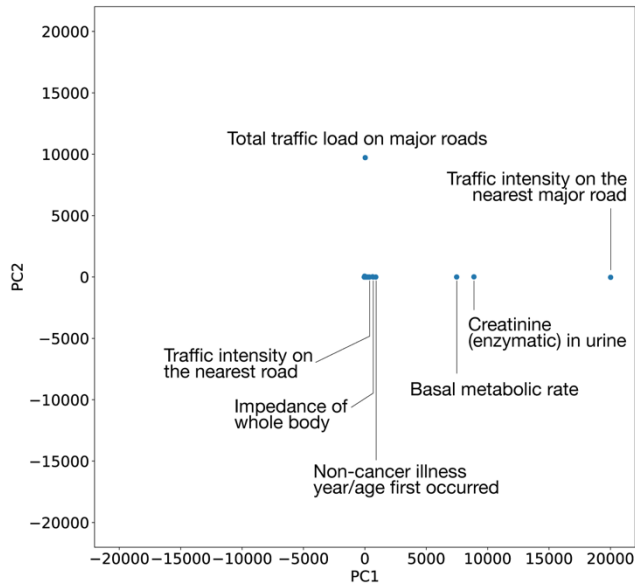

**b** Individual PCA plot of the phenotype TSVD

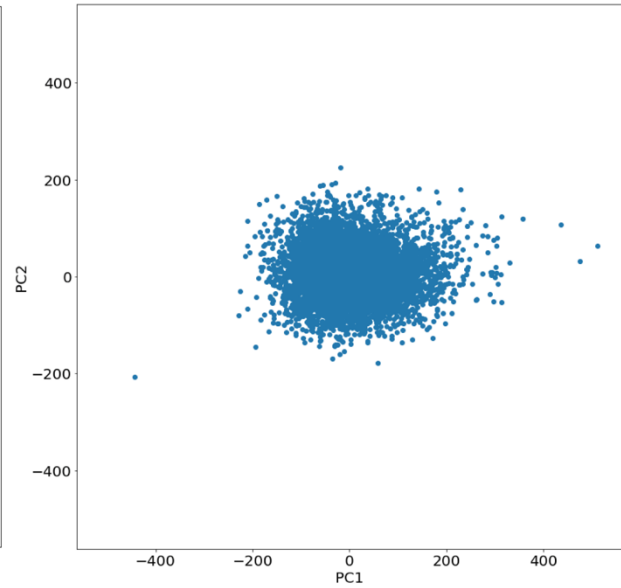

**Supplementary Fig. 5. Decomposition of phenotype data.** Characterization of latent structures of phenotypic data characterized by truncated singular value decomposition (TSVD) of the imputed and normalized phenotype data. Phenotype (a) and Individual (b) PCA plots summarizes the first two components.

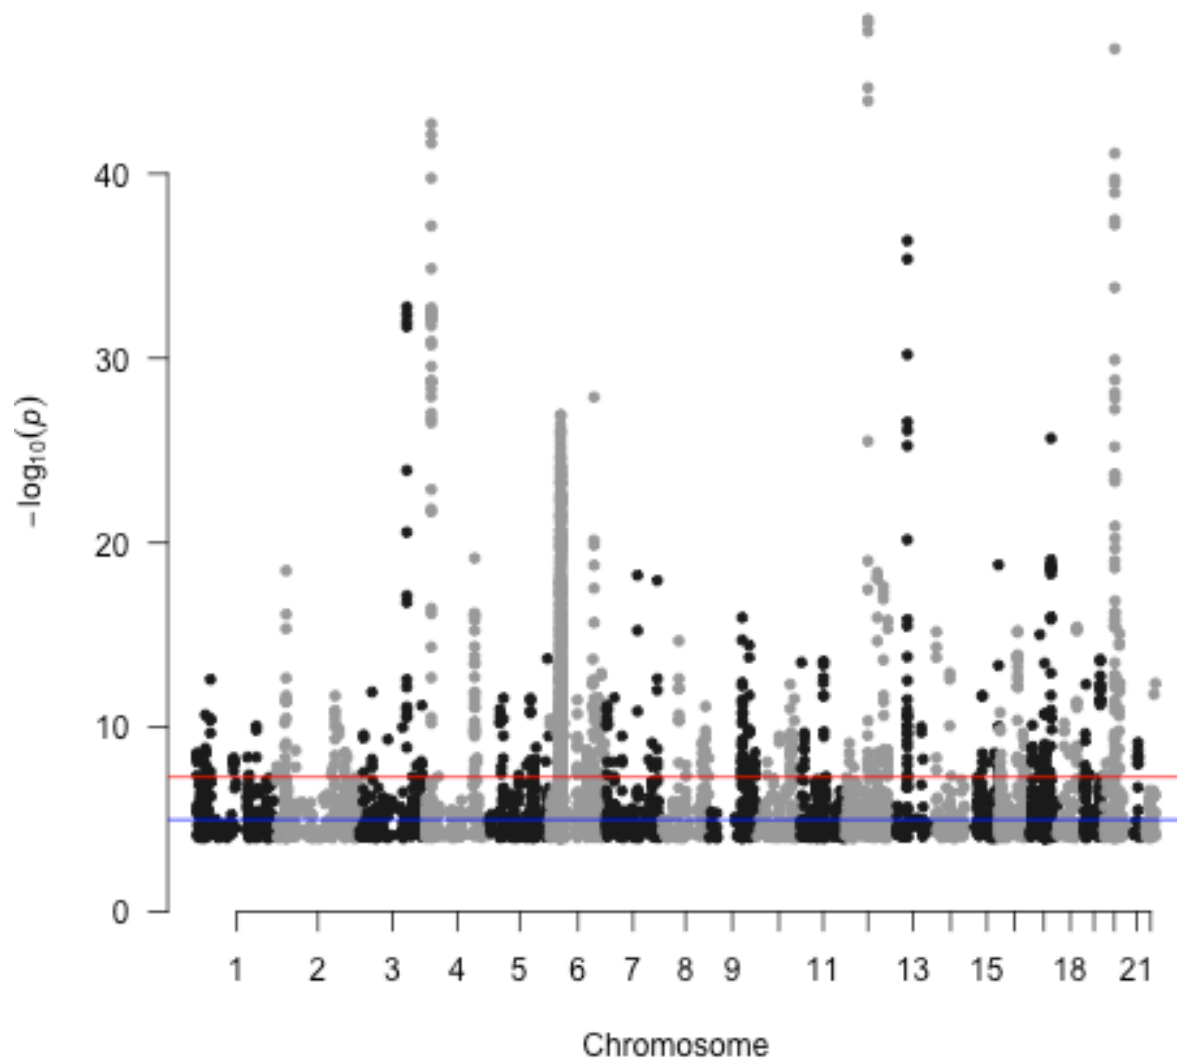

**Supplementary Fig. 6. Genome-wide association analysis of the phenotype PCs.** After characterizing the phenotype latent space with TSVD on the phenotype data, we performed GWAS analysis. The statistical significance for the first phenotype component is shown in the plot. The variants with  $p < 1.0 \times 10^{-4}$  are shown. The red and blue lines indicate genome-wide significance ( $5.0 \times 10^{-8}$ ) and genome-wide suggestive ( $5.0 \times 10^{-5}$ ) levels, respectively.

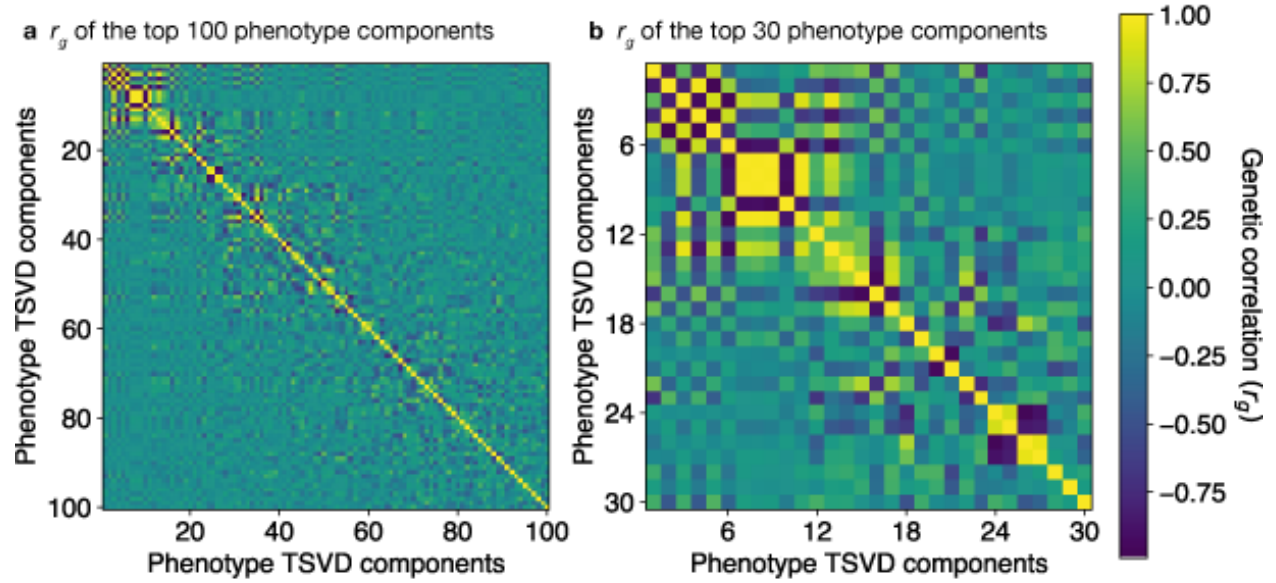

**Supplementary Fig. 7. Pairwise similarity of association statistics among phenotype PCs.** Genetic correlation ( $r_g$ ) of phenotype TSVD components shown for the top 100 components (a) and the top 30 components (b), respectively.



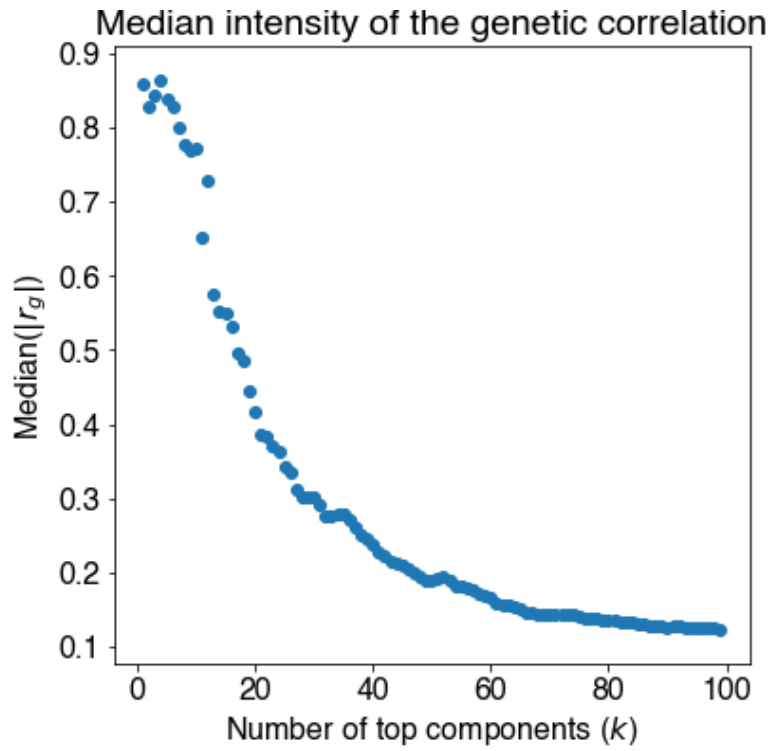

**Supplementary Fig. 8. Genetic correlation computed for phenotype PCs.** The median of the absolute value of the genetic correlation ( $r_g$ ) among the top phenotypic components.

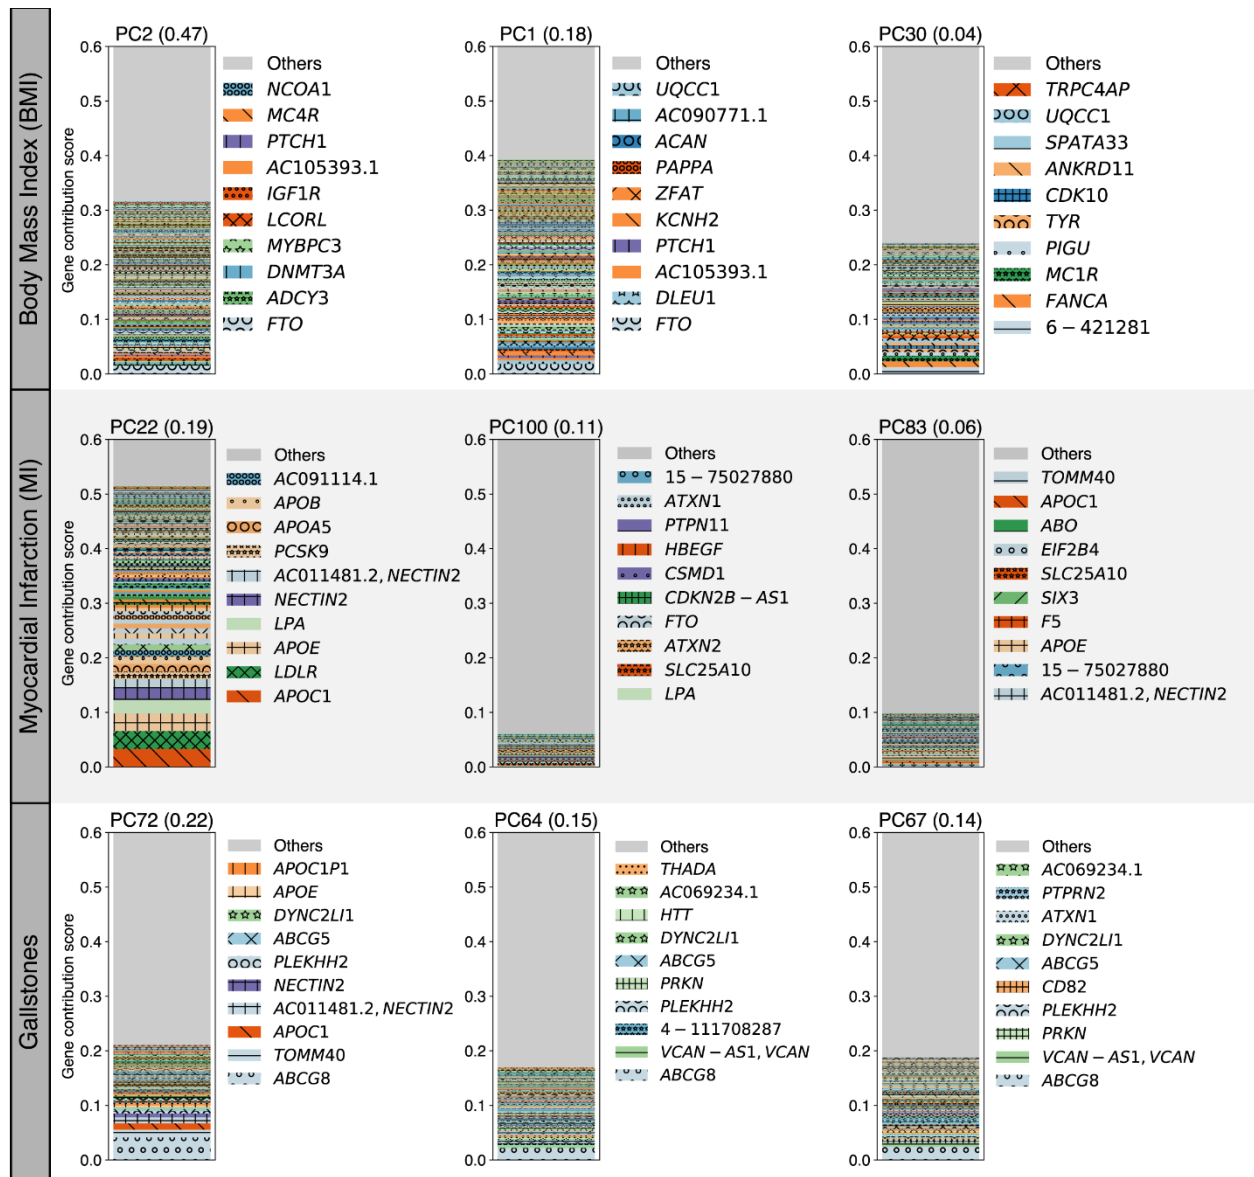

**Supplementary Fig. 9. Gene contribution scores for the “all” dataset.** Gene contribution scores for the top three key components for body mass index (BMI), myocardial infarction (MI), and gallstones using all variant dataset, which includes both coding and non-coding variants. For each phenotype, the top three key components with their phenotype squared cosine scores are shown on the top of the stacked bar plot and gene contribution scores for each of the components are shown as colored segments. Each colored segment represents a gene with at least 0.05% of contribution scores and the rest of the genes are aggregated as the gray bar at the top. For the visualization, the maximum value of the vertical axis is set to be 0.6. For each component, the labels for the top 10 driving genes are shown. For non-coding variants, we display their genomic coordinates. Source data are provided in Supplementary Data 2.

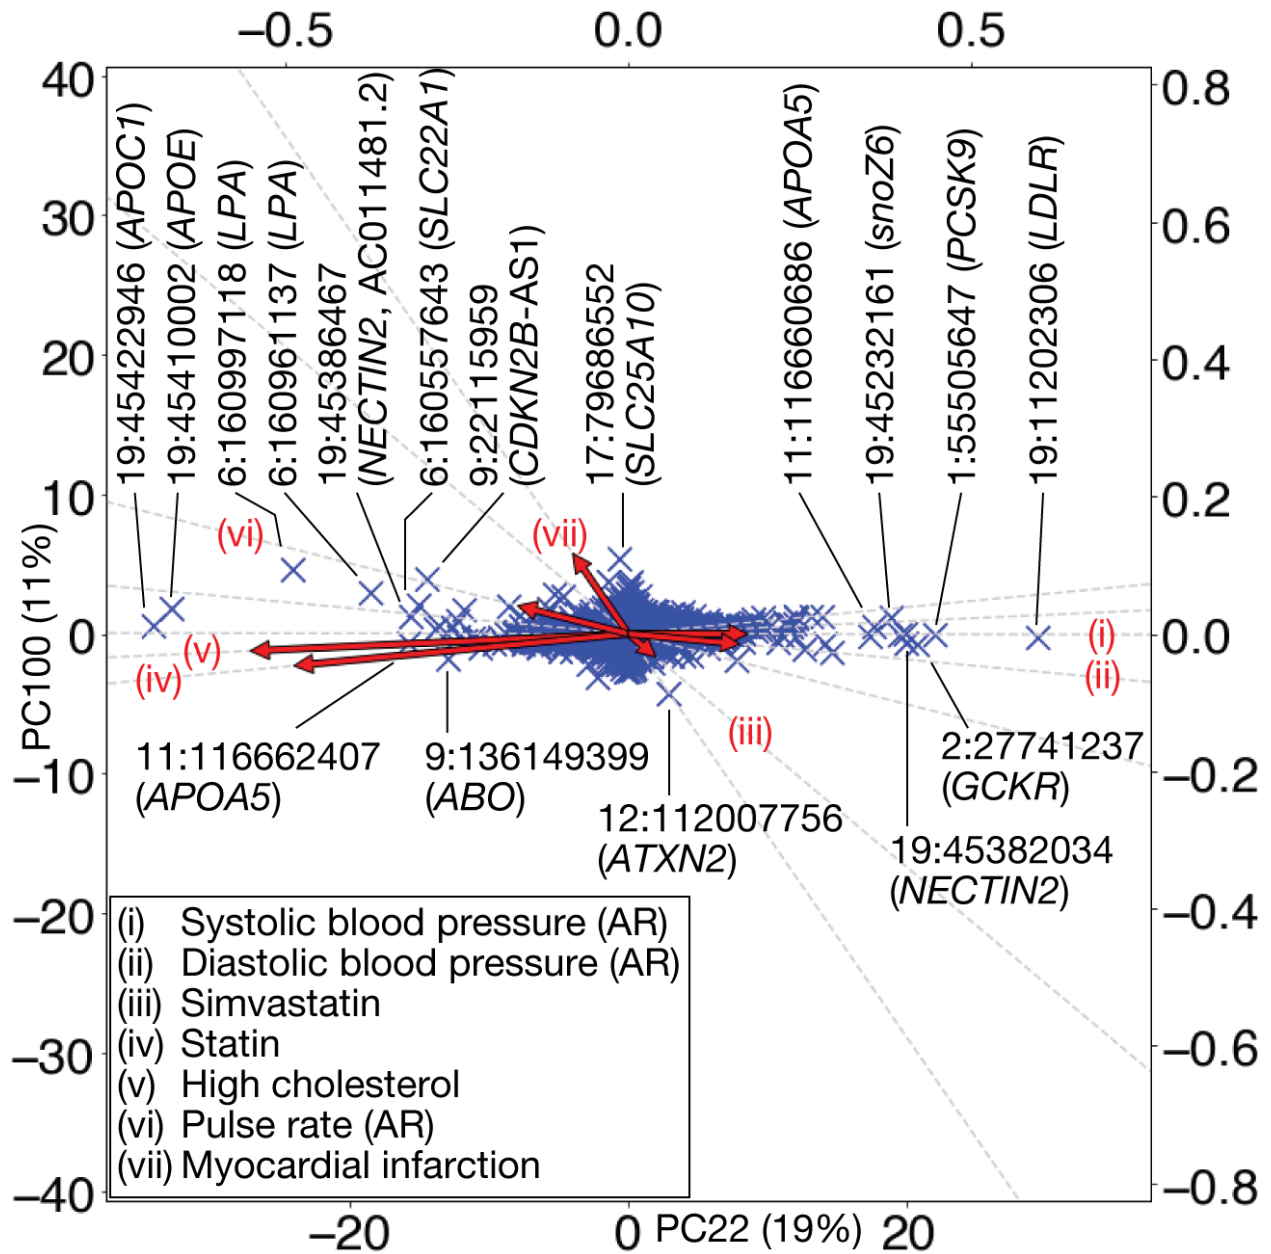

**Supplementary Fig. 10. The biplot annotation of the top two components for MI.** Variant PCA plot with biplot annotation for the top two key components for myocardial infarction using “all” dataset. Genetic variants projected into the top two key components, PC22 (horizontal axis) and PC100 (vertical axis) are shown as scatter plot. Variants are annotated with gene symbols. Directions of genetic associations for relevant phenotypes are annotated as red arrows using the secondary axes (Methods). Abbreviations. AR: automated reading.

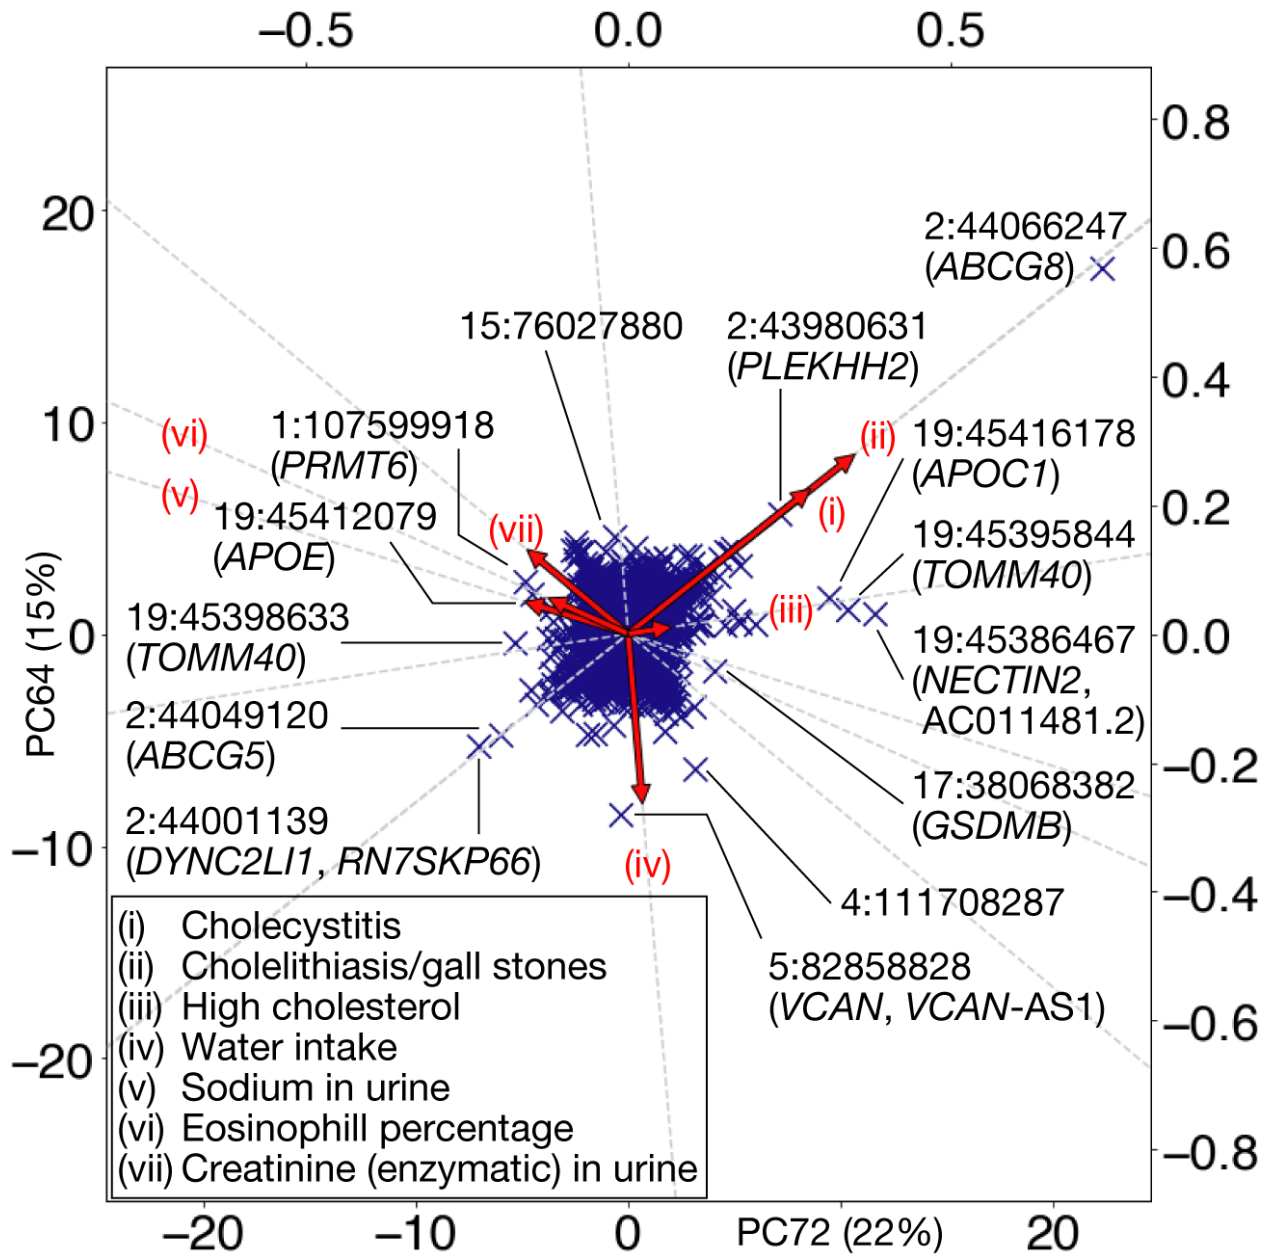

**Supplementary Fig. 11. The biplot annotation of the top two components for gallstones.**

Variant PCA plot with biplot annotation for the top two key components for gallstones using “all” dataset. Genetic variants projected into the top two key components, PC72 (horizontal axis) and PC64 (vertical axis). Variants are annotated with gene symbols. Directions of genetic associations for relevant phenotypes are annotated as red arrows using the secondary axes (Methods).

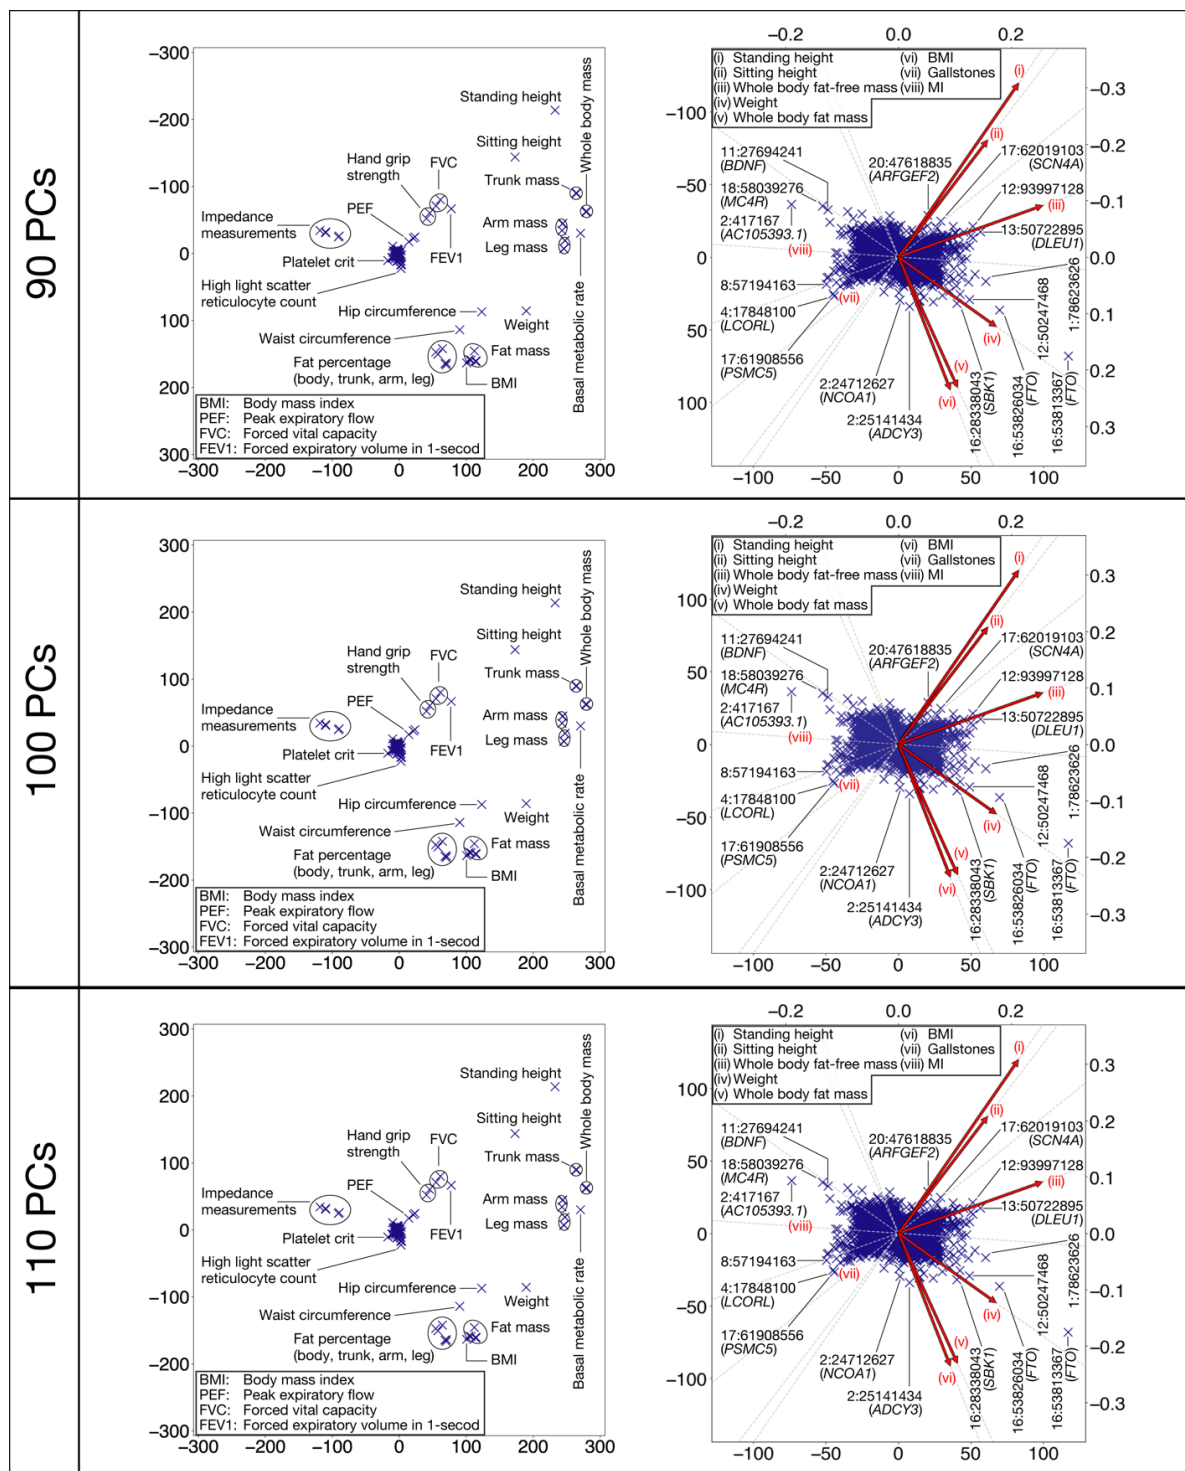

**Supplementary Fig. 12. Robustness analysis of the top two DeGAs components.** Comparison of the top two DeGAs components by robustness analysis with respect to the number of latent factors in DeGAs. The phenotype PCA plot (left) and the variant PCA plot with the biplot annotations (right) are shown (Methods). To cope with the sign indeterminacy of the latent components, the direction of PC2 is reversed in the plots for TSVD with 90 PCs.



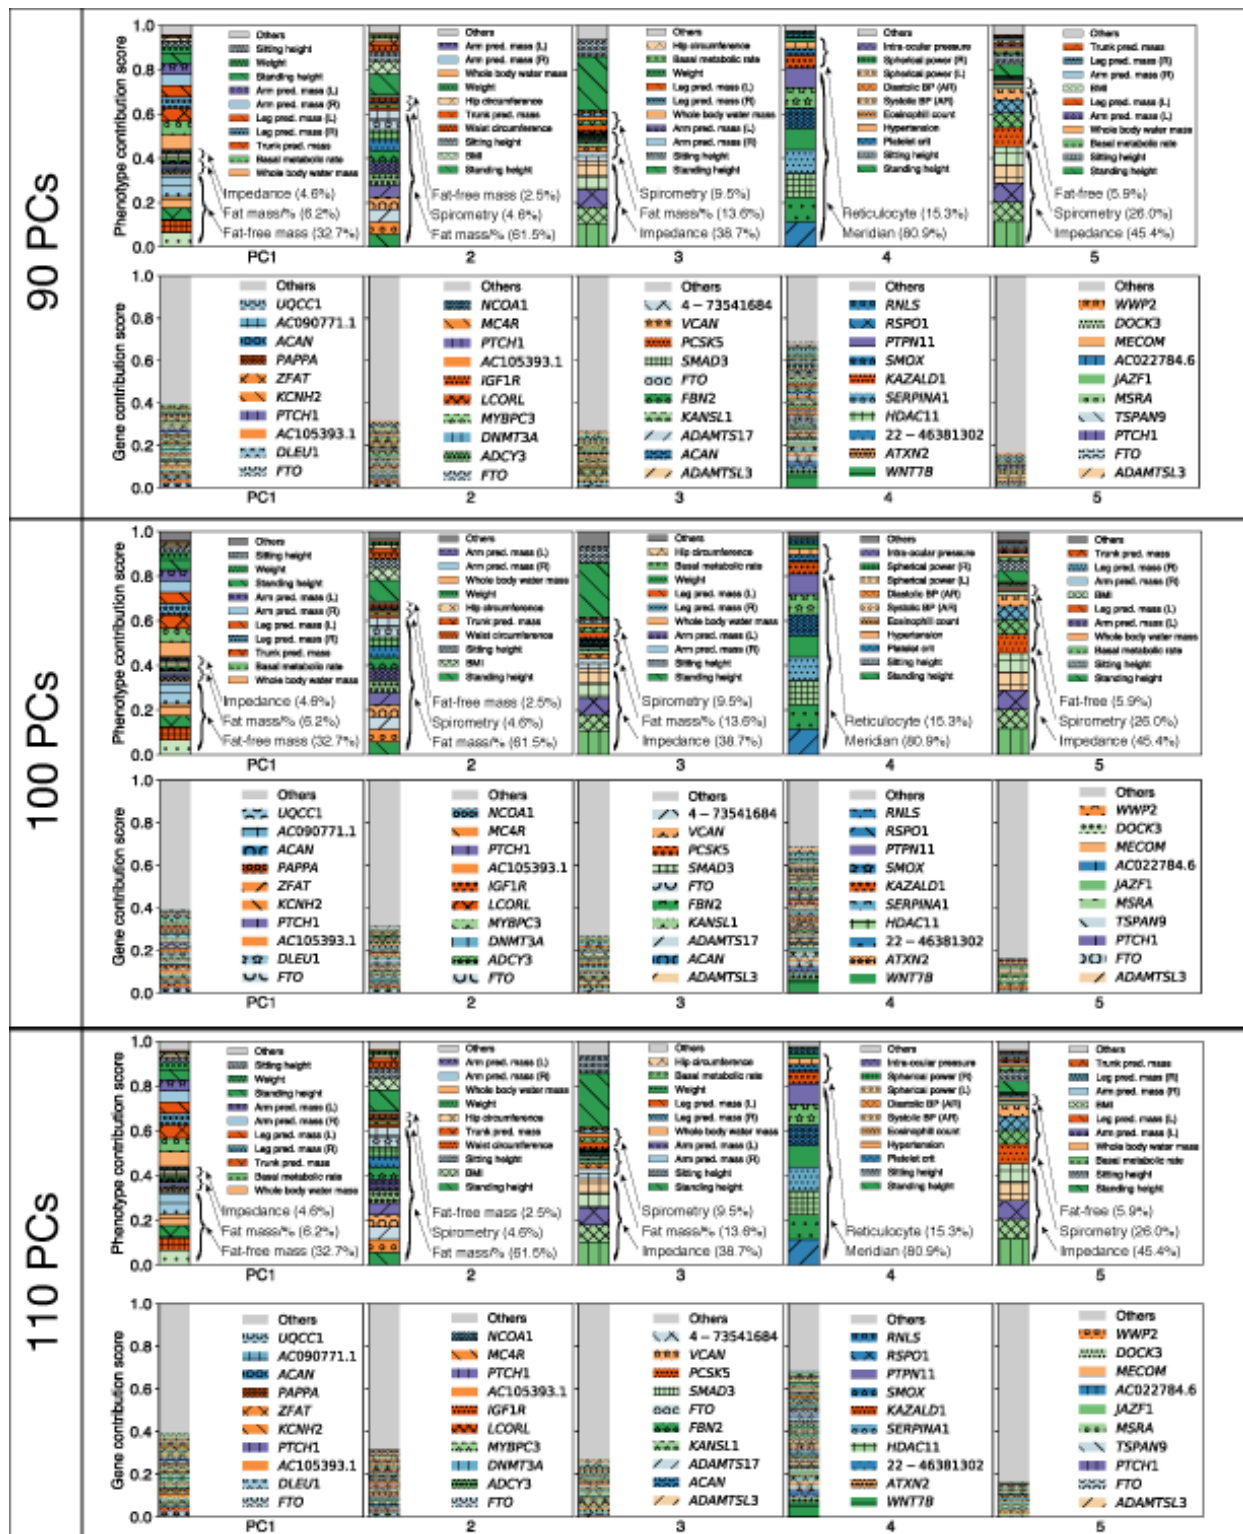

**Supplementary Fig. 13. Robustness analysis of the top five DeGAs components.**

Comparison of the top five DeGAs components by robustness analysis with respect to the number of latent factors in DeGAs. The phenotype and gene contribution scores are shown. Each colored segment represents a phenotype or gene with at least 0.5% and 0.05% of phenotype and

gene contribution scores, respectively, and the rest is aggregated as others on the top of the stacked bar plots. The major contributing phenotype groups (Methods, Supplementary Table 2) and additional top 10 phenotypes and the top 10 genes for each component are annotated.

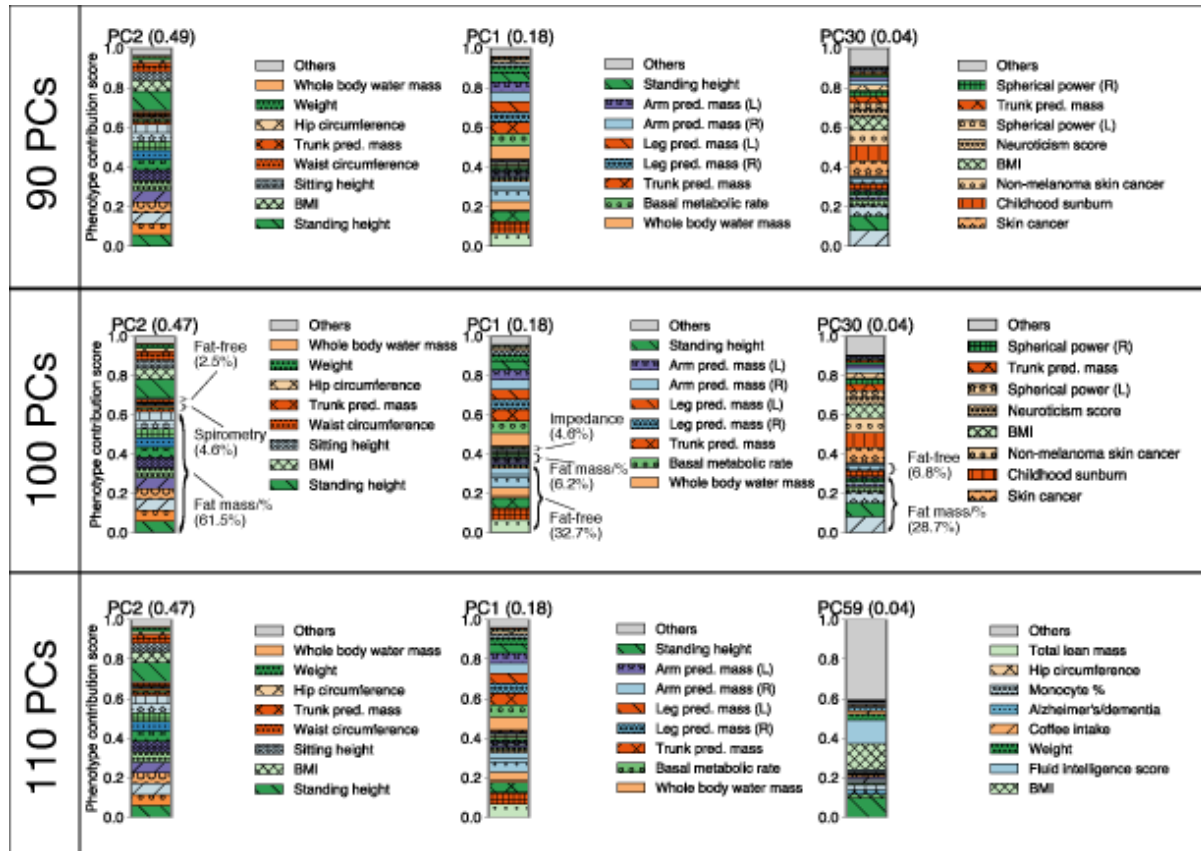

**Supplementary Fig. 14. Robustness analysis of the top three components for BMI.**

Comparison of the key components for body mass index (BMI) by robustness analysis with respect to the number of latent factors in DeGAs. For each condition, the top three key components with their phenotype squared cosine scores are shown on the top of the stacked bar plot and phenotype contribution scores for each of the components are shown as colored segments. Each colored segment represents a gene with at least 0.5% of contribution scores and the rest of the phenotypes are aggregated as the gray bar at the top. For each component, the labels for the top 6 driving phenotypes are shown.



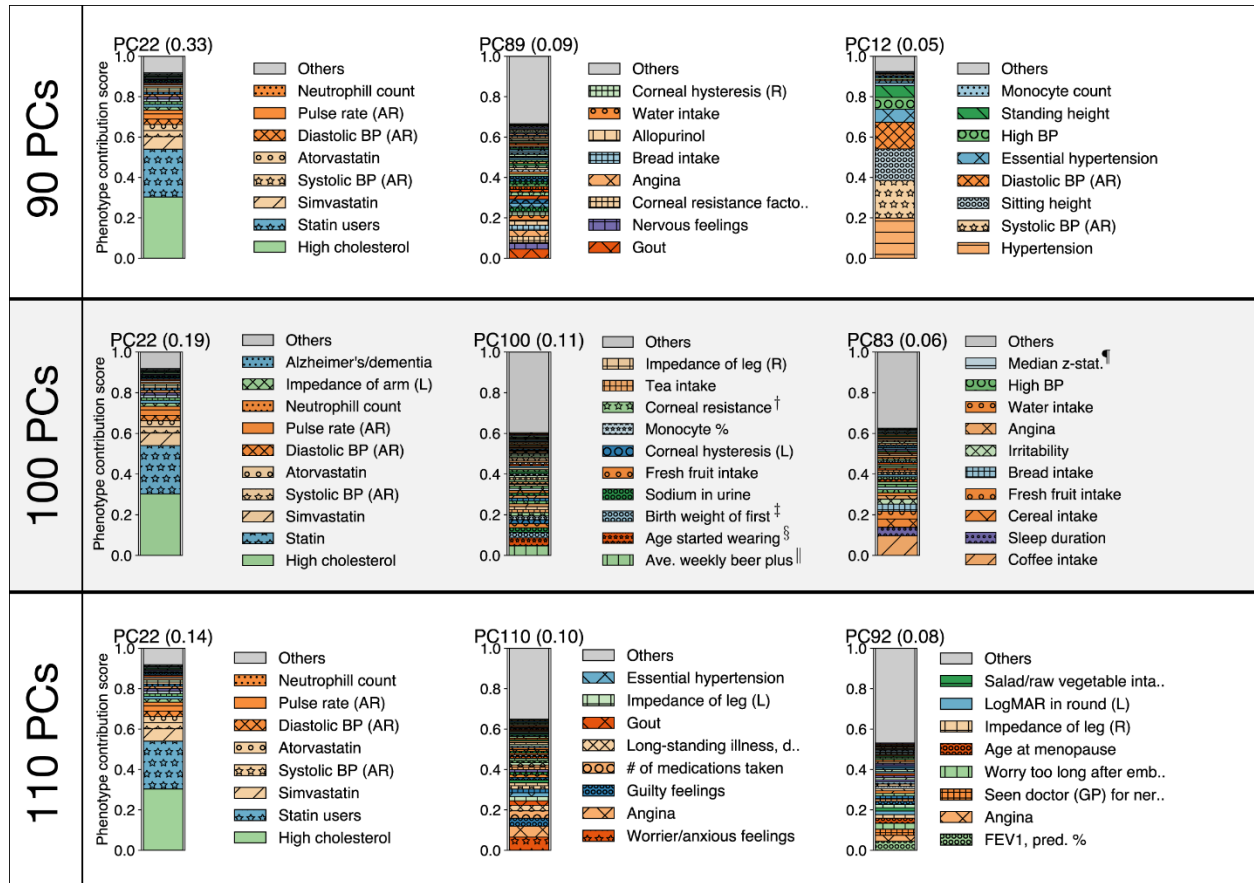

**Supplementary Fig. 15. Robustness analysis of the top three components for MI.**

Comparison of the key components for myocardial infarction (MI) by robustness analysis with respect to the number of latent factors in DeGAs. For each condition, the top three key components with their phenotype squared cosine scores are shown on the top of the stacked bar plot and phenotype contribution scores for each of the components are shown as colored segments. Each colored segment represents a gene with at least 0.5% of contribution scores and the rest of the phenotypes are aggregated as the gray bar at the top. For each component, the labels for the top 6 driving phenotypes are shown.

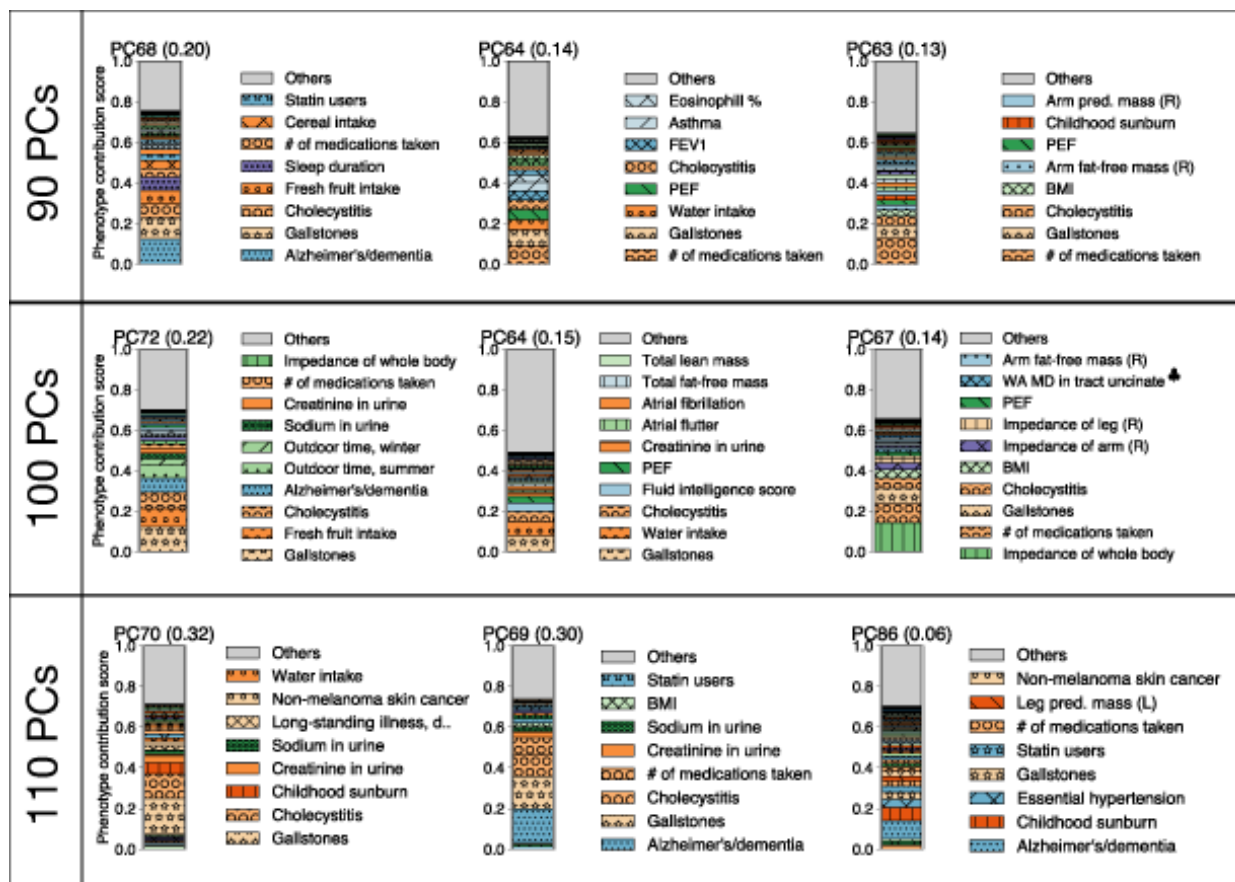

**Supplementary Fig. 16. Robustness analysis of the top three components for gallstones.** Comparison of the key components for gallstones by robustness analysis with respect to the number of latent factors in DeGAs. For each condition, the top three key components with their phenotype squared cosine scores are shown on the top of the stacked bar plot and phenotype contribution scores for each of the components are shown as colored segments. Each colored segment represents a gene with at least 0.5% of contribution scores and the rest of the phenotypes are aggregated as the gray bar at the top. For each component, the labels for the top 6 driving phenotypes are shown.

**GREAT ontology enrichment analysis for driving variants of the key components of MI**

Radius: GREAT binomial fold change  
 Color Gradient:  $-\log_{10}$  (GREAT binomial p-value)

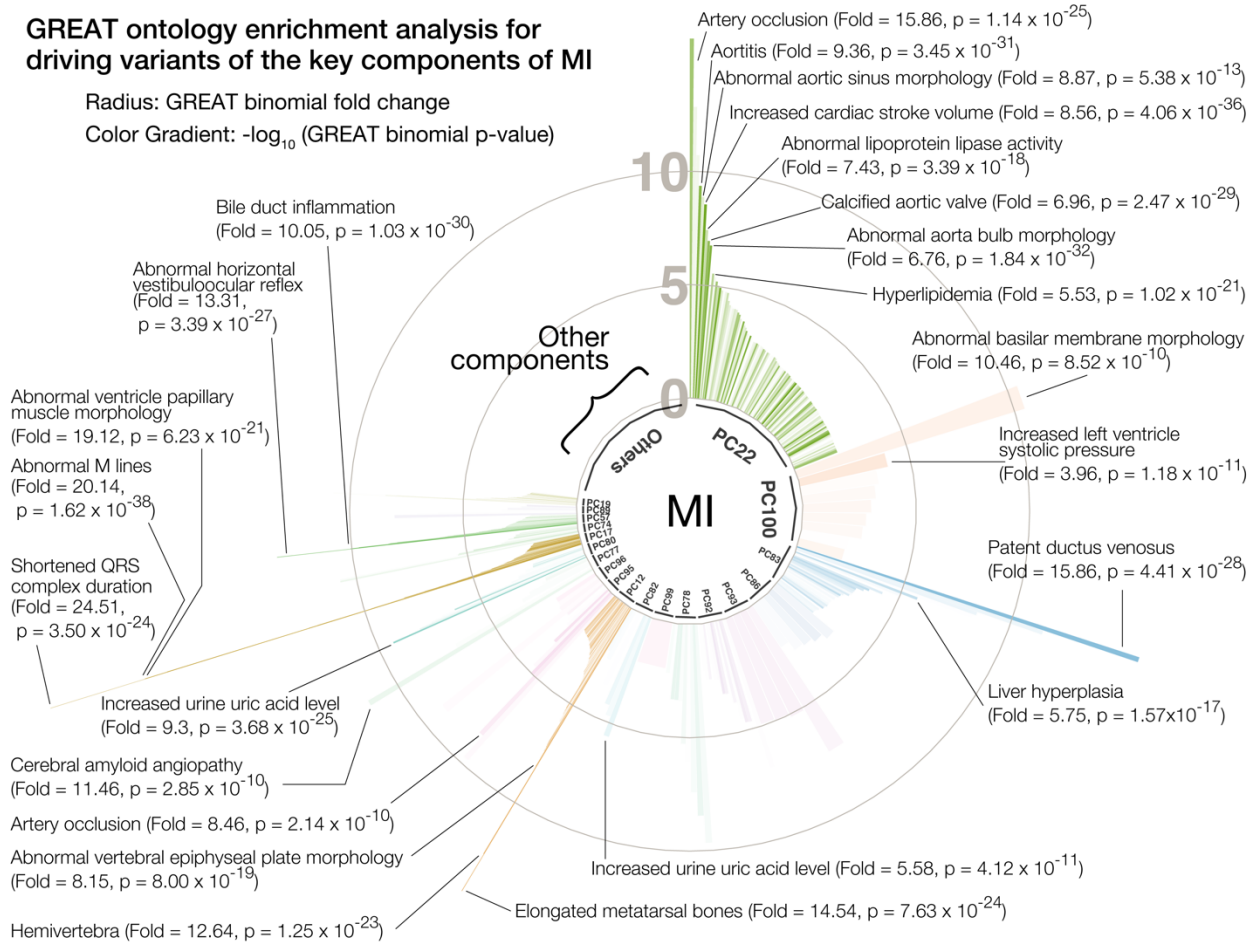

**Supplementary Fig. 17. The GREAT enrichment analysis for MI.** Biological characterization of driving non-coding and coding variants of the key components for myocardial infarction (MI) with the genomic region enrichment analysis tool (GREAT) using the all variants dataset. The key components are shown proportional to their squared cosine score along with significantly enriched terms in mouse genome informatics (MGI) phenotype ontology. The radius represents binomial fold change and the color gradient represents  $-\log_{10}$  (p-value) from GREAT ontology enrichment analysis. Source data are provided in Supplementary Data 4.

### GREAT ontology enrichment analysis for driving variants of the key components of gallstones

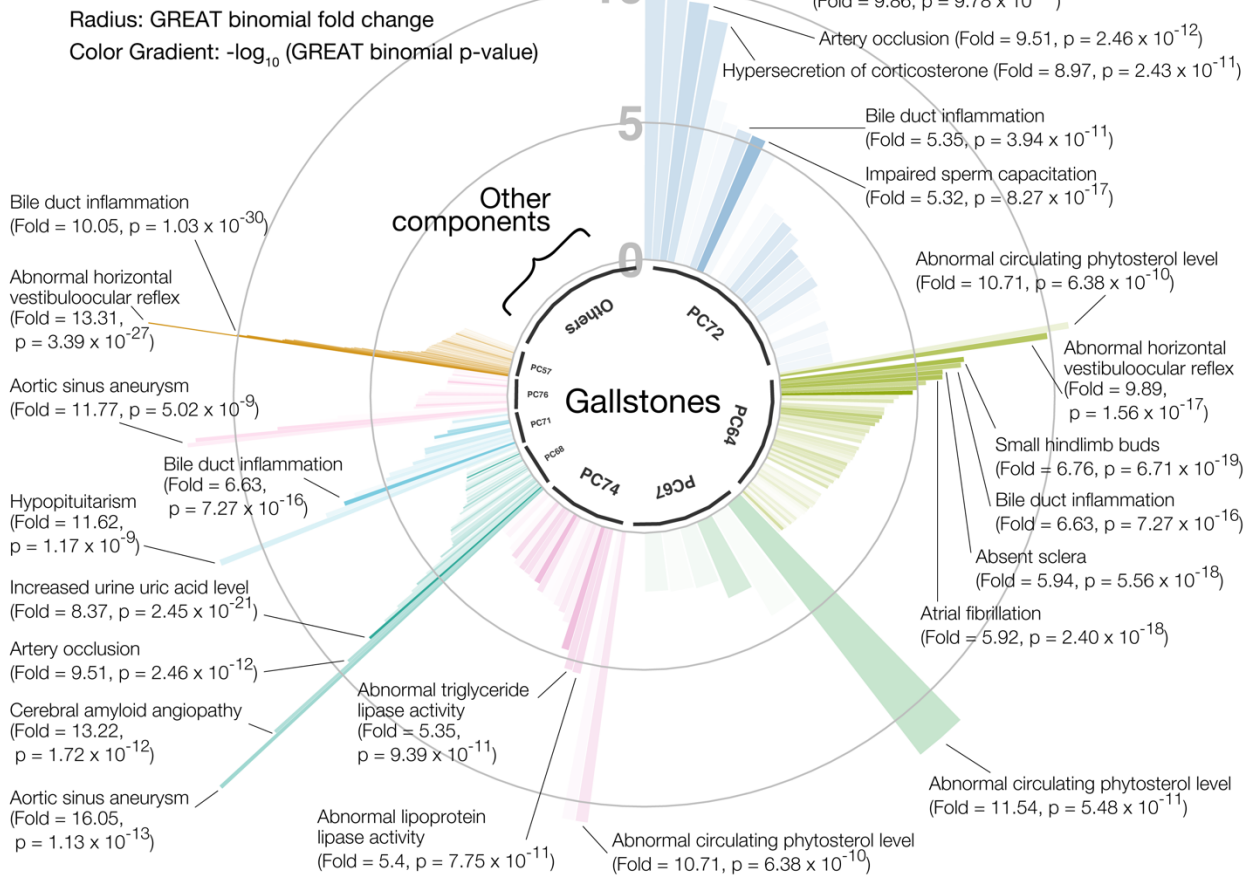

**Supplementary Fig. 18. The GREAT enrichment analysis for gallstones.** Biological characterization of driving non-coding and coding variants of the key components for gallstones with the genomic region enrichment analysis tool (GREAT) using the all variants dataset. The key components are shown proportional to their squared cosine score along with significantly enriched terms in mouse genome informatics (MGI) phenotype ontology. The radius represents binomial fold change and the color gradient represents  $-\log_{10}$ (p-value) from GREAT ontology enrichment analysis. Source data are provided in Supplementary Data 5.

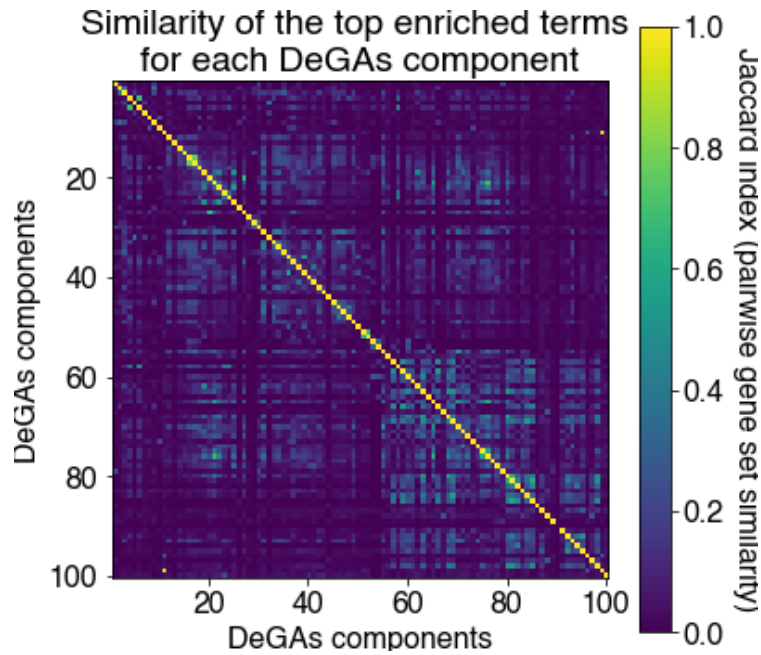

**Supplementary Fig. 19. Similarity of the top enriched terms for each DeGAs component.** For each DeGAs component, we took the top enriched ontology terms identified by GREAT and obtained the list of genes annotated with that term. Using these gene sets, we quantified the pairwise gene set similarity across the 100 DeGAs components using a set similarity measure, Jaccard Index, that ranges from 0 (completely disjoint) to 1 (completely identical) (Methods).

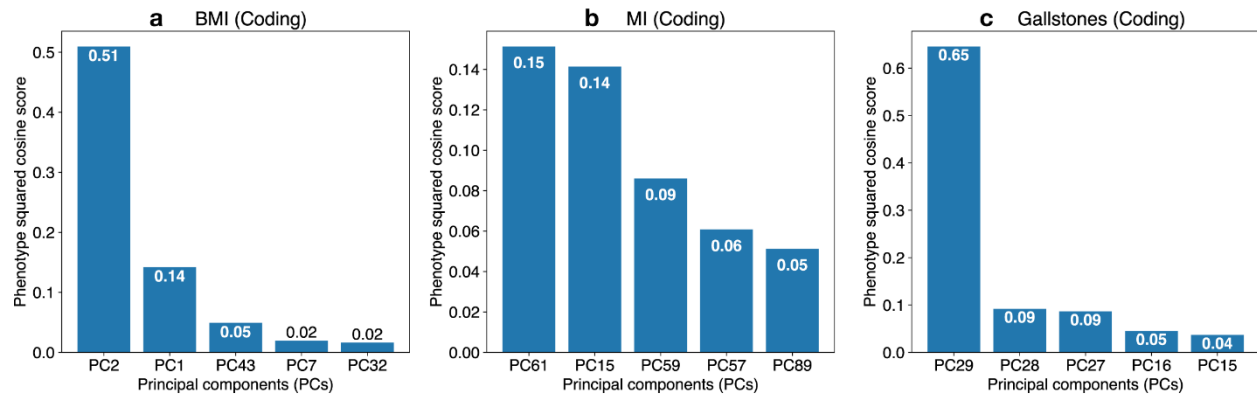

**Supplementary Fig. 20. Identification of the key components using coding dataset.** Identification of the key components with phenotype squared cosine scores using coding dataset. Squared cosine score quantifies relative importance of the key components for a given phenotype. The top five key components are identified for coding dataset for three phenotypes: **a** body mass index (BMI), **b** myocardial infarction (MI), and **c** gallstones. The top five key components are shown on the horizontal axis and the corresponding squared cosine scores are shown on the vertical axis.



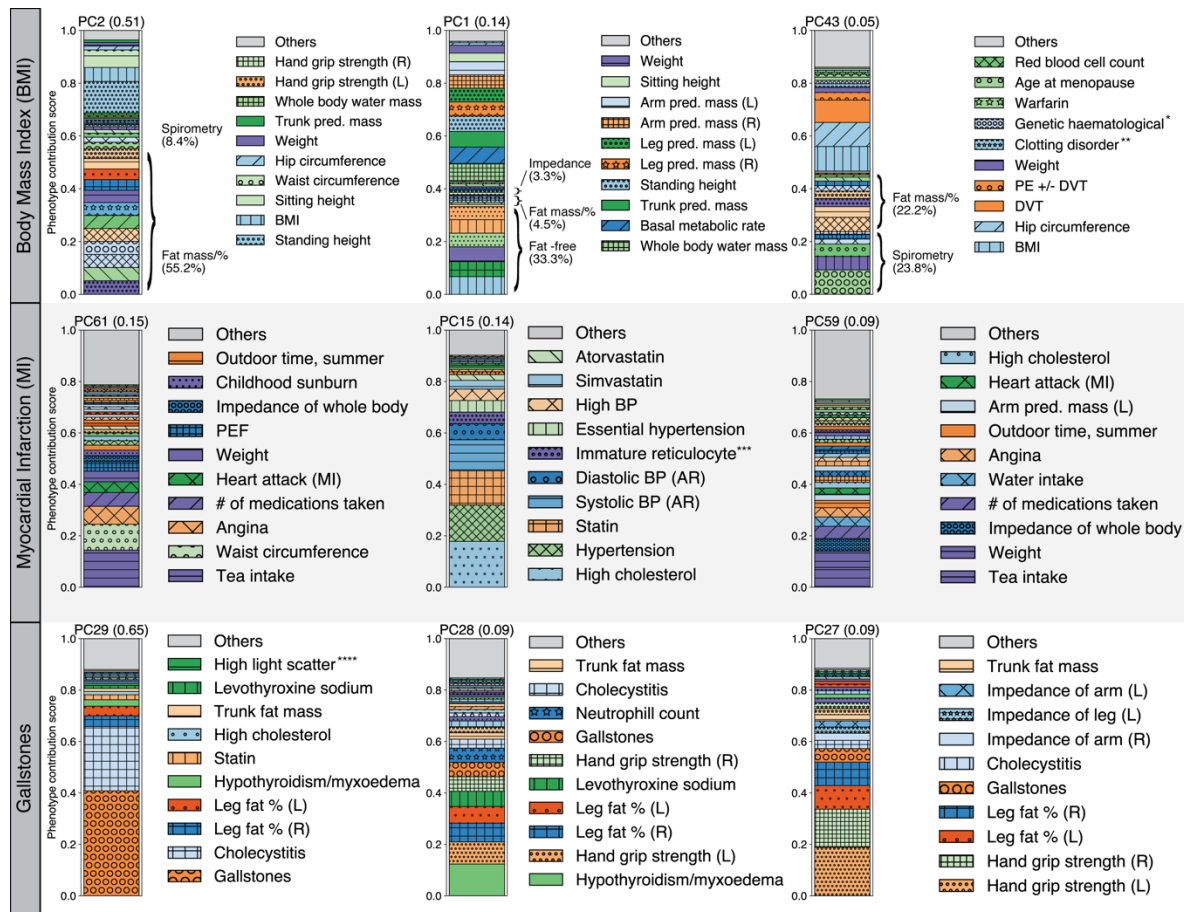

**Supplementary Fig. 21. Phenotype contribution scores for the coding dataset.** Phenotype contribution scores for the top three key components for body mass index (BMI), myocardial infarction (MI), and gallstones using coding dataset. For each phenotype, the top three key components with their phenotype squared cosine scores are shown on the top of the stacked bar plot and phenotype contribution scores for each of the components are shown as colored segments. Each colored segment represents a phenotype with at least 0.5% of contribution scores and the rest of the genes are aggregated as the gray bar at the top. For BMI, additional phenotype grouping is applied (Methods, Supplementary Table 2). For each component, the labels for the top 10 driving genes are shown. Source data are provided in Supplementary Data 2.

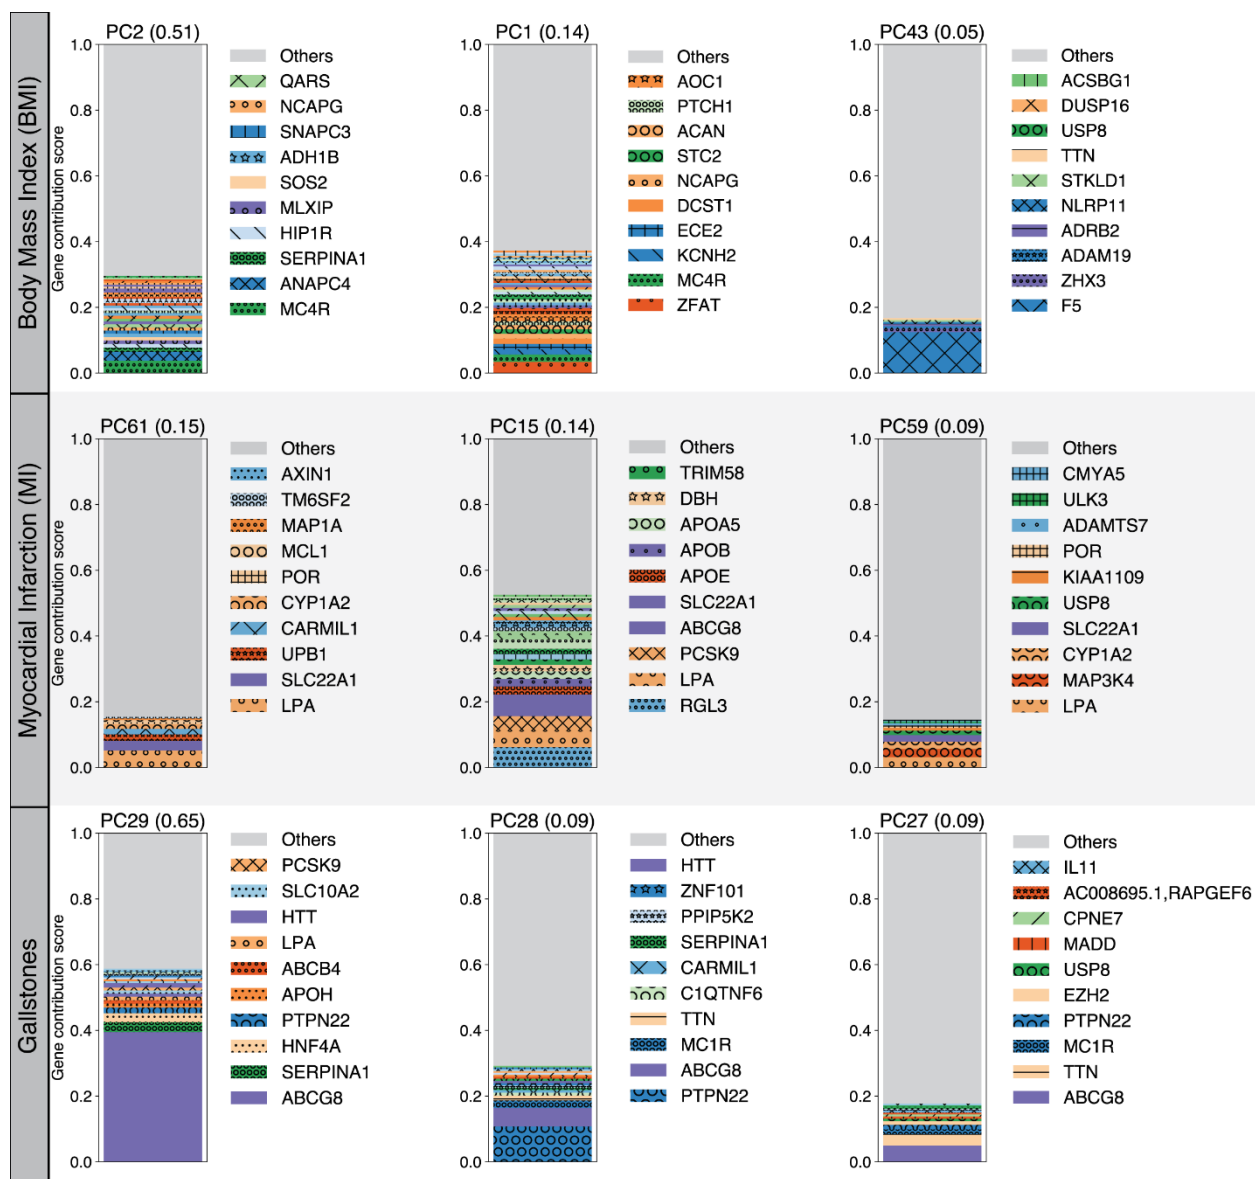

**Supplementary Fig. 22. Gene contribution scores for the coding dataset.** Gene contribution scores for the top three key components for body mass index (BMI), myocardial infarction (MI), and gallstones using coding dataset. For each phenotype, the top three key components with their phenotype squared cosine scores are shown on the top of the stacked bar plot and gene contribution scores for each of the components are shown as colored segments. Each colored segment represents a gene with at least 0.05% of contribution scores and the rest of the genes are aggregated as the gray bar at the top. For each component, the labels for the top 10 driving genes are shown. Source data are provided in Supplementary Data 2.



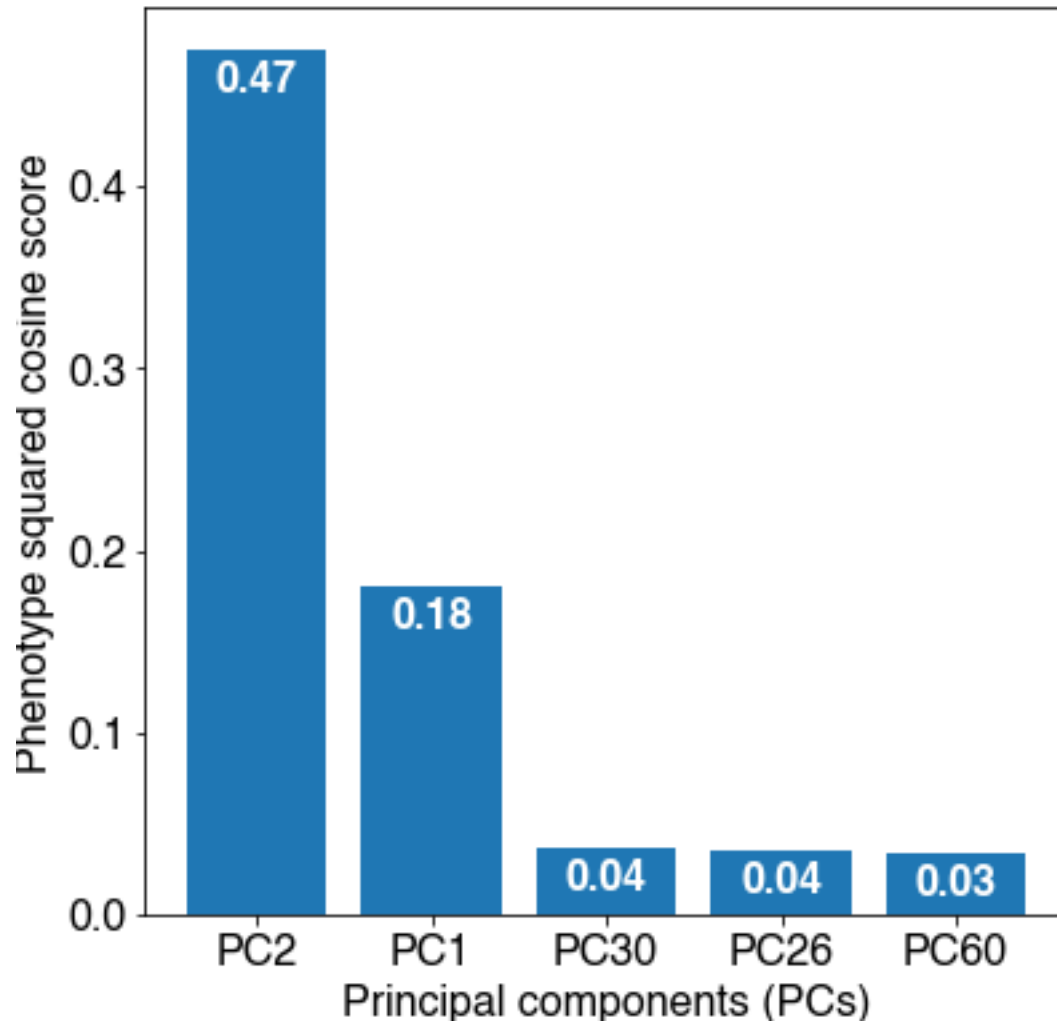

**Supplementary Fig. 23. Identification of the key components using PTVs dataset.** Identification of the key components for BMI with phenotype squared cosine scores using the PTVs dataset. The top five key components are shown on the horizontal axis and the corresponding squared cosine scores are shown on the vertical axis.

**a** PheWAS analysis of rs150090666 (*PDE3B*) for binary phenotypes

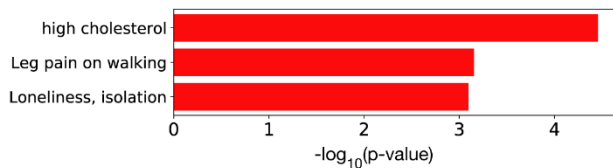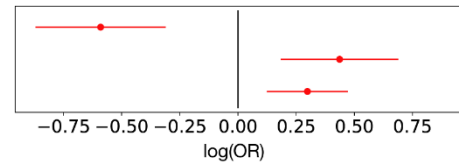

**b** PheWAS analysis of rs150090666 (*PDE3B*) for quantitative phenotypes

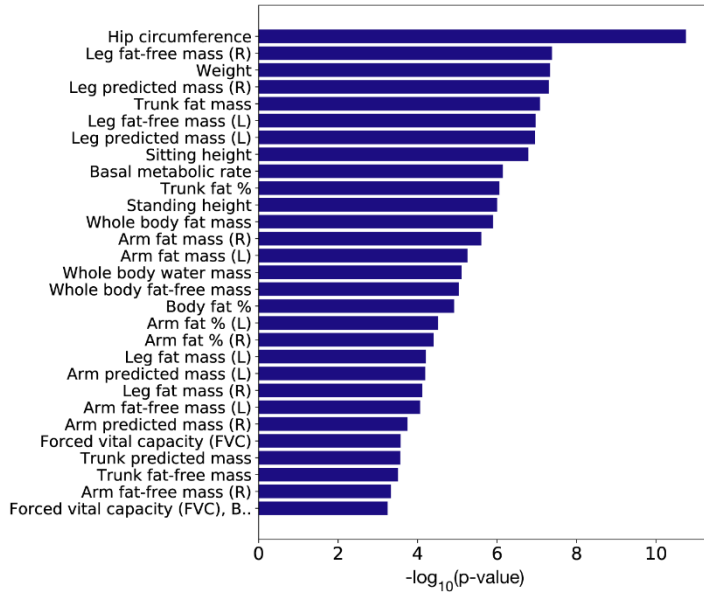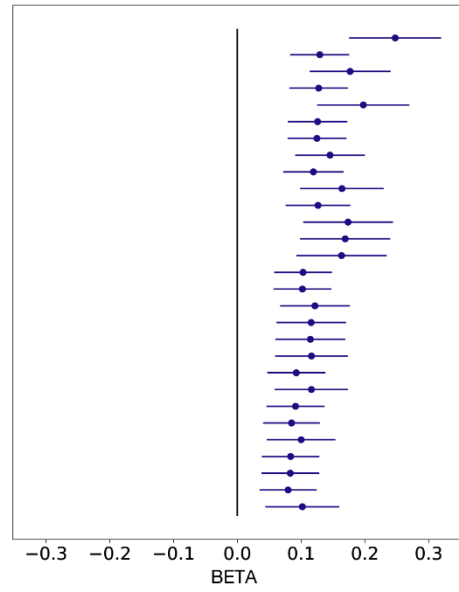

**Supplementary Fig. 24. PheWAS scan for rs150090666, a stop-gain variant in *PDE3B*.** The p-values (left) and log odds ratio (binary phenotypes, shown as red) or beta (quantitative phenotypes, shown as blue) (right) along with 95% confidence interval are shown for the phenotypes with minimum case count of 1,000 (binary phenotypes, **a**) or 1,000 individuals with non-missing values (quantitative phenotypes, **b**) and strong association ( $p \leq 0.001$ ) and with this variants among all the phenotypes used in the study ( $n = 337,199$  White British individuals in the UK Biobank for binary traits and  $n > 255,000$  for each quantitative trait, Supplementary Table 3). Source data are provided in Supplementary Table 4.

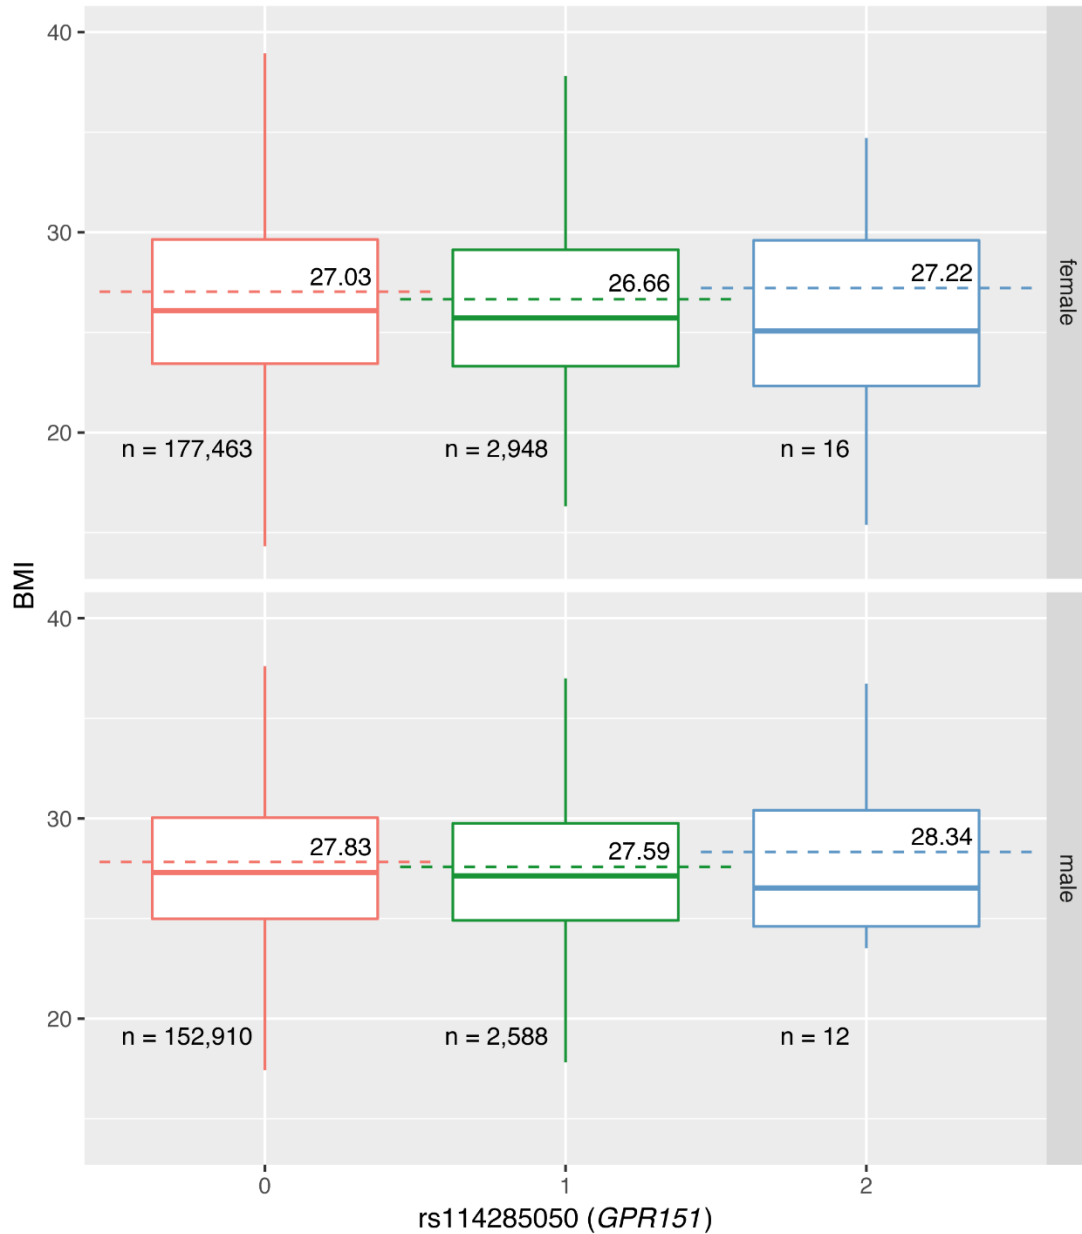

**Supplementary Fig. 25. The distribution of BMI stratified by sex and rs114285050.** The phenotype values are stratified by genotype of rs114285050, a stop-gain variant in *GPR151*. The outliers are removed from the plot and the mean values are annotated and shown as dashed lines. In the box plots, the median, two hinges (the first and the third quartiles) and two whiskers are shown. The upper whisker extends from the hinge to the largest value no further than  $1.5 \times \text{IQR}$  from the hinge (where IQR is the inter-quartile range, or distance between the first and third quartiles). The number of carriers of the variant (n) is shown at the bottom.

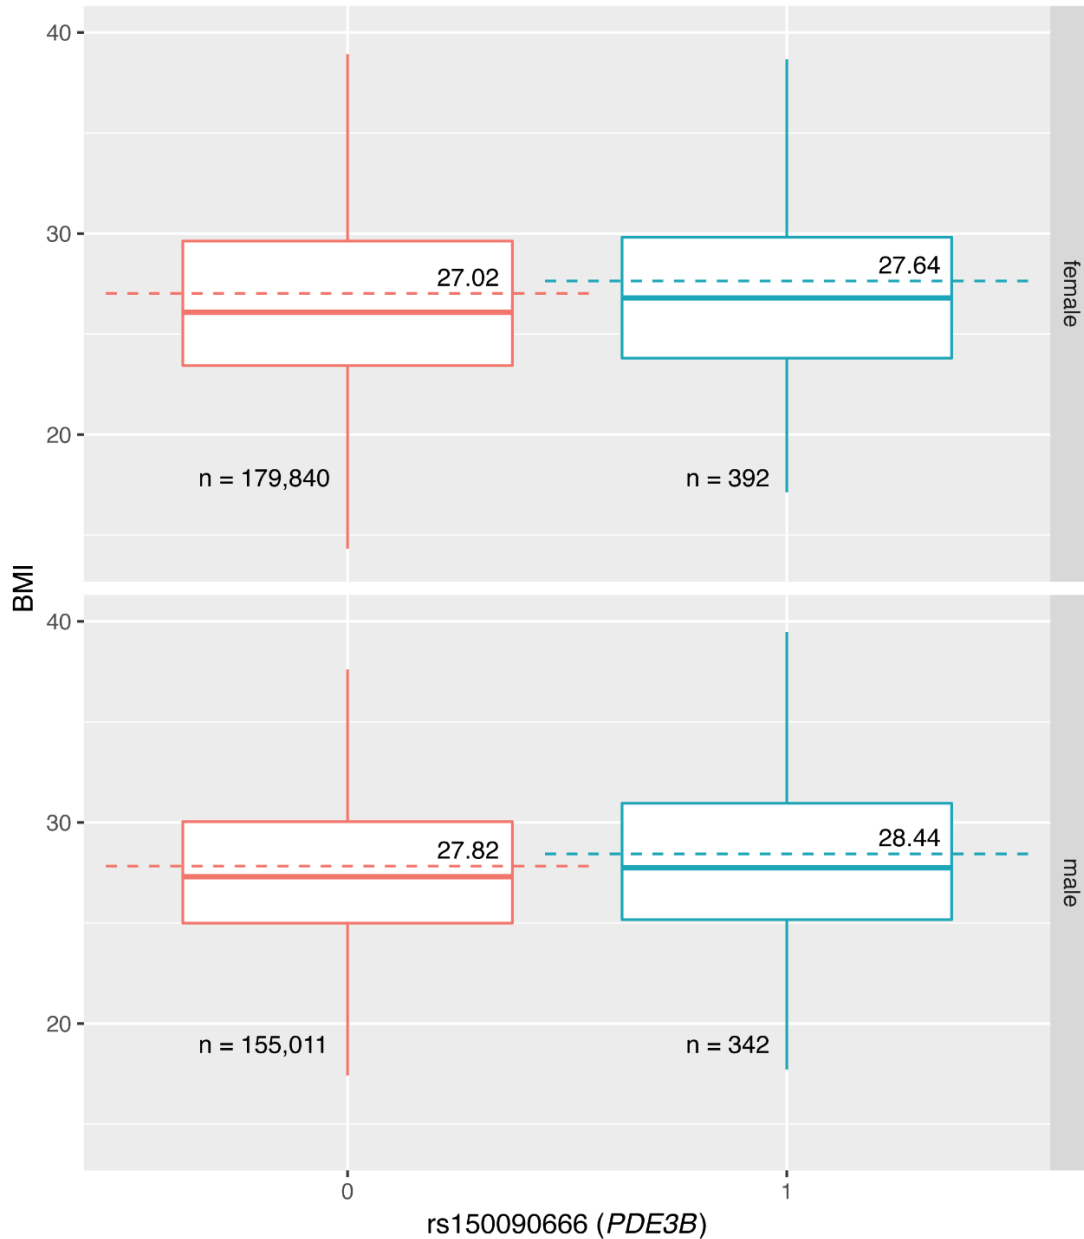

**Supplementary Fig. 26. The distribution of BMI stratified by sex and rs150090666.** The phenotype values are stratified by genotype of rs150090666, a stop-gain variant in *PDE3B*. The outliers are removed from the plot and the mean values are annotated and shown as dashed lines. In the box plots, the median, two hinges (the first and the third quartiles) and two whiskers are shown. The upper whisker extends from the hinge to the largest value no further than  $1.5 * \text{IQR}$  from the hinge (where IQR is the inter-quartile range, or distance between the first and third quartiles). The number of carriers of the variant (n) is shown at the bottom.

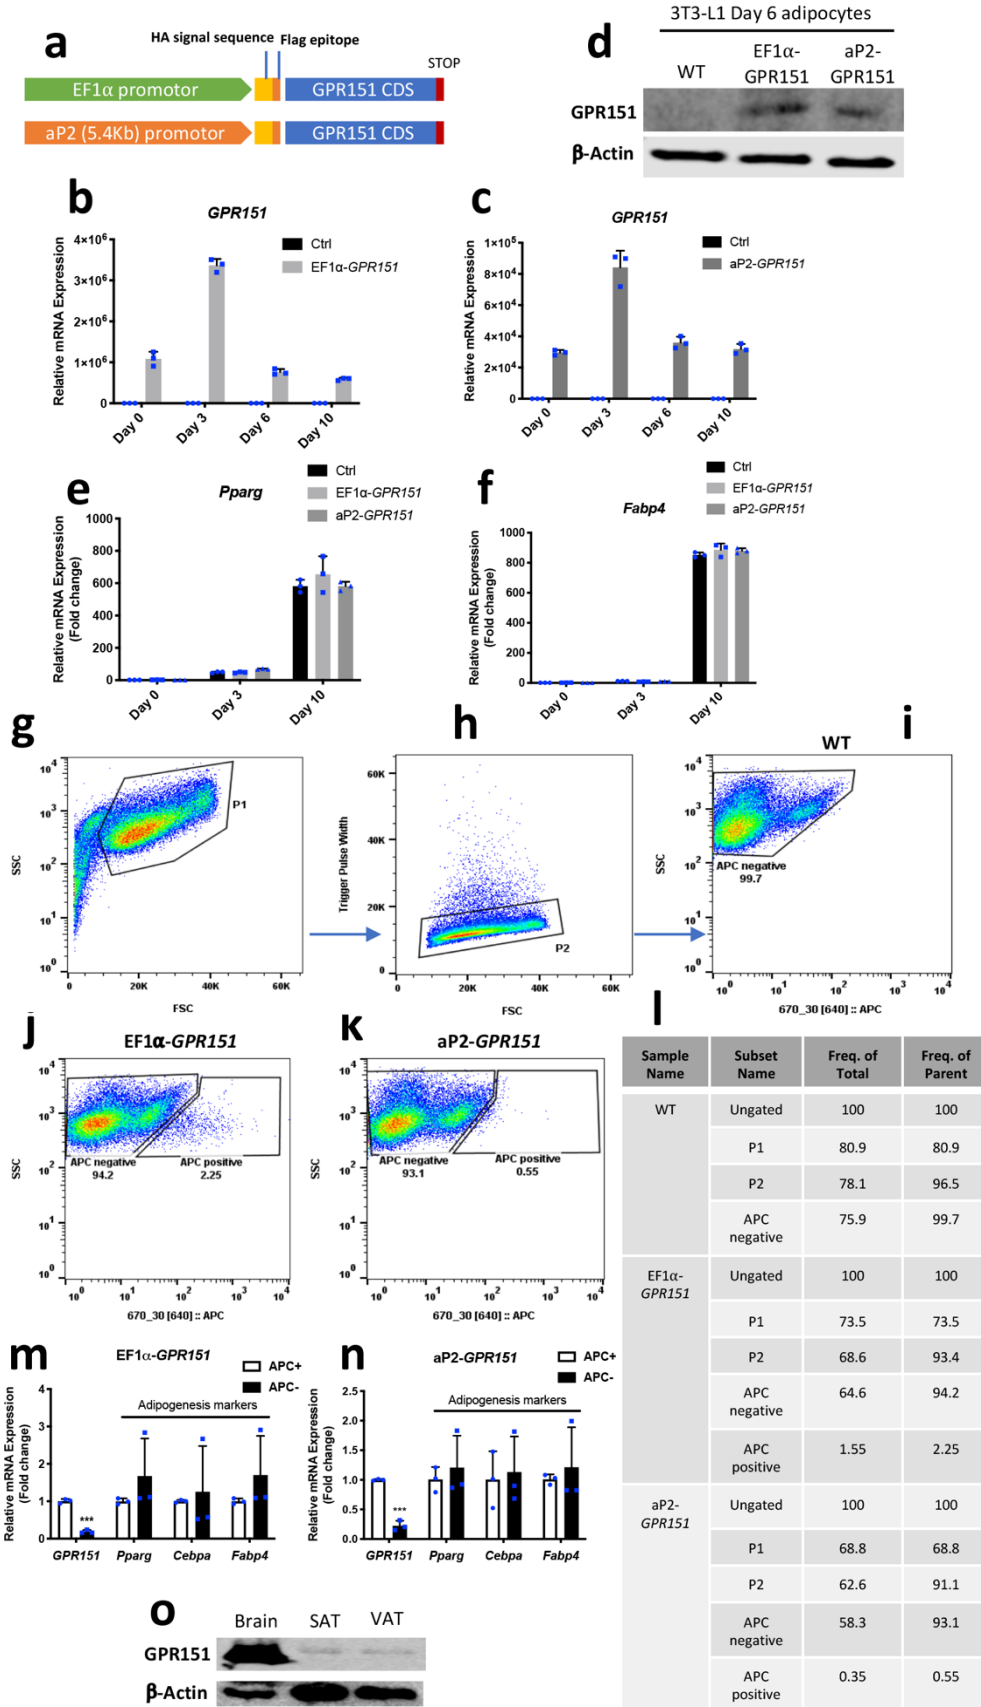

**Supplementary Fig. 27. Effects of *GPR151* overexpression on 3T3-L1 adipogenesis. a** Structure of *GPR151* overexpression construct driven by either EF1 $\alpha$  or aP2 promotor. **b-d** Confirmation of *GPR151* overexpression at both mRNA (**b-c**) and protein levels (**d**) in 3T3-L1 cells during adipogenesis. n=3 independent experiments. **e-f** qPCR analysis of the effect of *GPR151* overexpression on adipogenesis markers, *Pparg* (**e**) and *Fabp4* (**f**). n=3 independent experiments. **g-i** FACS gating strategy to sort APC<sup>+</sup> and APC<sup>-</sup> adipocytes used for qPCR analysis of *GPR151* and adipogenesis markers presented in Supplementary Fig. 27m-n. Cells were initially selected by size, on the basis of forward scatter (FSC) and side scatter (SSC) (**g**). Cells were then gated on both FSC and SSC singlets to ensure that individual cells were analyzed (**h**). Non-infected Day 6 3T3-L1 wild-type (WT) adipocytes were used to determine background fluorescence levels (**i**). **j-l** Representative FACS collection gates used to sort Day 6 3T3-L1 adipocytes infected with either EF1 $\alpha$ -*GPR151* (**j**) or aP2-*GPR151* (**k**) (shown as APC positive), in comparison to WT (shown as APC negative). The abundance of the relevant cell population in post-sort fractions were listed in **l**. **m-n** Relative mRNA levels of *GPR151* and adipogenic markers (*Pparg*, *Cebpa*, *Fabp4*) in purified APC<sup>+</sup> and APC<sup>-</sup> cells from Day 6 3T3-L1 adipocytes infected by either EF1 $\alpha$ -*GPR151* (**m**) or aP2-*GPR151* (**n**). n=3 independent experiments. **o** Comparison of protein levels of GPR151 in mouse brain, subcutaneous adipose tissue (SAT) and visceral adipose tissue (VAT). For bar plots, means  $\pm$  SEM are shown. ND: not-detectable. Source data are provided as a Source Data file.

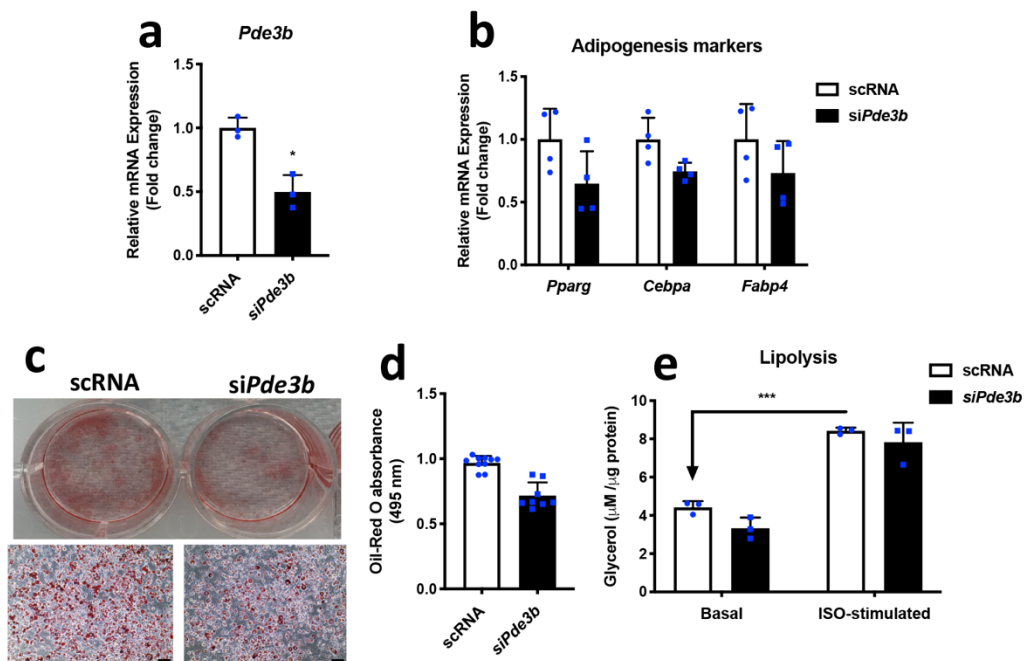

**Supplementary Fig. 28. Effects of *Pde3b* knockdown in 3T3-L1 adipogenesis.** **a** qPCR analysis of *Pde3b* mRNA knockdown in 3T3-L1 preadipocytes. n=3 independent experiments. **b** qPCR analysis of the effect of si*Pde3b* knockdown on adipogenesis markers, *Pparg*, *Cebpa* and *Fabp4*. n=4 independent experiments. **c-d** Oil-Red O staining (**c**) and quantification (**d**) of lipid droplets in scRNA- or si*Pde3b*-transfected adipocytes. 10x magnification. Scale bar = 100µm. n=10 independent culture wells for scRNA, n=8 for si*Pde3b*. **e** lipolysis assays of scRNA- or si*Pde3b*-transfected adipocytes. n=3 independent experiments. Means ± SEM are shown (\*\*p-value<0.001, \*p-value<0.05). scRNA: scrambled siRNA. ISO: isoproterenol. Source data are provided as a Source Data file.

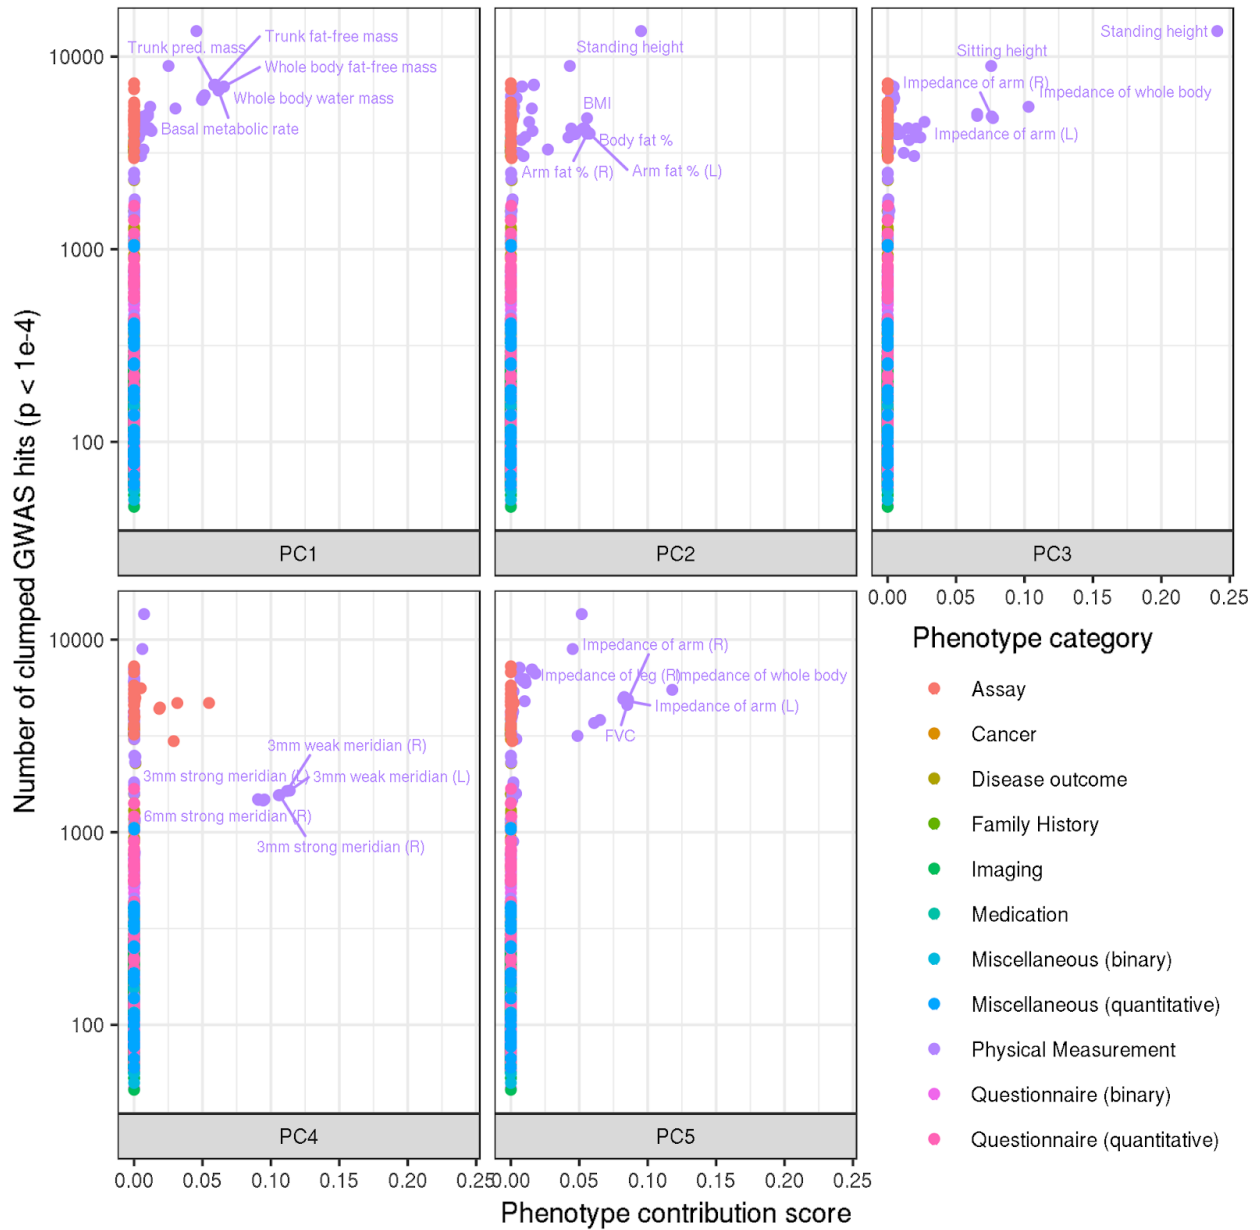

**Supplementary Fig. 29. Phenotype contribution scores and the number of GWAS hits.** The phenotype contribution score (x-axis) and the number of clumped GWAS hits ( $p < 1e-4$ , y-axis) are shown for the first five DeGAs components (PC1-5). Each point is a phenotype and they are grouped and colored by phenotype categories defined in Supplementary Table 1 and Supplementary Data 1.



## Supplementary Tables

**Supplementary Table 1. List of phenotype categories used in our study with examples.** The type column indicates whether the phenotype is binary (B) or quantitative (Q). Number of phenotypes, example phenotype for each, and data source are shown. L: described in a previously published literature<sup>1</sup>, F: the UK Biobank data field ID, and C: the UK Biobank data category ID.

| Phenotype category           | Type | Number of phenotypes | Example                            | Data source |
|------------------------------|------|----------------------|------------------------------------|-------------|
| Disease outcome              | B    | 363                  | Hypertension                       | L           |
| Cancer                       | B    | 46                   | Skin cancer                        | L           |
| Family History               | B    | 10                   | High blood pressure                | L           |
| Medication                   | B    | 709                  | Aspirin intake                     | F: 20003    |
| Questionnaire (binary)       | Q    | 49                   | Wears glasses or contact lenses    | C:100025    |
| Imaging                      | Q    | 683                  | Volume of white matter             | C:100003    |
| Physical Measurement         | Q    | 122                  | Standing height                    | C:100006    |
| Assay                        | Q    | 34                   | Red blood cell (erythrocyte) count | C:100079    |
| Questionnaire (quantitative) | Q    | 62                   | Sleep duration                     | C:100079    |
| Miscellaneous (binary)       | B    | 19                   | Ever attempted suicide             |             |
| Miscellaneous (quantitative) | Q    | 41                   | Number of medications taken        |             |

**Supplementary Table 2. Phenotype groupings for visualization.** The list of phenotype groups used in the phenotype contribution score plots are summarized.

| Phenotype groups            | List of phenotypes in the group            |
|-----------------------------|--------------------------------------------|
| Fat-free                    | Arm fat-free mass (left)                   |
|                             | Arm fat-free mass (right)                  |
|                             | Leg fat-free mass (left)                   |
|                             | Leg fat-free mass (right)                  |
|                             | Total fat-free mass                        |
|                             | Trunk fat-free mass                        |
|                             | Whole body fat-free mass                   |
| Fat                         | Android fat mass                           |
|                             | Android tissue fat percentage              |
|                             | Arm fat mass (left)                        |
|                             | Arm fat mass (right)                       |
|                             | Arm fat percentage (left)                  |
|                             | Arm fat percentage (right)                 |
|                             | Arm tissue fat percentage (left)           |
|                             | Arm tissue fat percentage (right)          |
|                             | Arms fat mass                              |
|                             | Arms tissue fat percentage                 |
|                             | Body fat percentage                        |
|                             | Gynoid fat mass                            |
|                             | Gynoid tissue fat percentage               |
|                             | Leg fat mass (left)                        |
|                             | Leg fat mass (right)                       |
|                             | Leg fat percentage (left)                  |
|                             | Leg fat percentage (right)                 |
|                             | Leg tissue fat percentage (left)           |
|                             | Leg tissue fat percentage (right)          |
|                             | Legs fat mass                              |
|                             | Legs tissue fat percentage                 |
|                             | Total fat mass                             |
|                             | Total tissue fat percentage                |
| Trunk fat mass              |                                            |
| Trunk fat percentage        |                                            |
| Trunk tissue fat percentage |                                            |
| Whole body fat mass         |                                            |
| Impedance                   | Impedance of arm (left)                    |
|                             | Impedance of arm (right)                   |
|                             | Impedance of leg (left)                    |
|                             | Impedance of leg (right)                   |
|                             | Impedance of whole body                    |
| Reticulocyte                | High light scatter reticulocyte count      |
|                             | High light scatter reticulocyte percentage |
|                             | Immature reticulocyte fraction             |
|                             | Mean reticulocyte volume                   |
|                             | Reticulocyte count                         |
|                             | Reticulocyte percentage                    |
| Meridian                    | 3mm strong meridian (left)                 |
|                             | 3mm strong meridian (right)                |
|                             | 3mm weak meridian (left)                   |
|                             | 3mm weak meridian (right)                  |

|            |                                                                   |
|------------|-------------------------------------------------------------------|
|            | 6mm strong meridian (left)                                        |
|            | 6mm strong meridian (right)                                       |
|            | 6mm weak meridian (left)                                          |
|            | 6mm weak meridian (right)                                         |
| Spirometry | Forced expiratory volume in 1-second (FEV1)                       |
|            | Forced expiratory volume in 1-second (FEV1), Best measure         |
|            | Forced expiratory volume in 1-second (FEV1), predicted            |
|            | Forced expiratory volume in 1-second (FEV1), predicted percentage |
|            | Forced vital capacity (FVC)                                       |
|            | Forced vital capacity (FVC), Best measure                         |
|            | Peak expiratory flow (PEF)                                        |

**Supplementary Table 3. Phenome-wide association (PheWAS) analysis for rs114285050.**

Summary statistics for a stop-gain variant in *GPR151* is shown. The phenotype code used in Global Biobank Engine (GBE\_code), phenotype name, N – the number of case individuals (for binary phenotypes) or individuals with non-missing values (for quantitative traits),  $-\log_{10}$  p-value, log odds ratio, log(OR), or BETA, and  $1.96 * \text{standard error of log(OR) or BETA}$  ( $1.96 * \text{SE}$ ) are shown.

| GBE code | Phenotype name             | N      | $-\log_{10}$ p-value | log(OR) or BETA | $1.96 * \text{SE}$ |
|----------|----------------------------|--------|----------------------|-----------------|--------------------|
| BIN1960  | Fed-up feelings            | 136434 | 3.041                | -0.09304        | 0.054978           |
| INI48    | Waist circumference        | 336659 | 7.599                | -0.06544        | 0.02301            |
| INI23100 | Whole body fat mass        | 330970 | 6.87                 | -0.06872        | 0.025539           |
| INI23128 | Trunk fat mass             | 331295 | 6.835                | -0.07053        | 0.026284           |
| INI23120 | Arm fat mass (right)       | 331422 | 6.816                | -0.06863        | 0.025617           |
| INI23099 | Body fat percentage        | 331318 | 6.816                | -0.05306        | 0.019816           |
| INI23127 | Trunk fat percentage       | 331314 | 6.79                 | -0.06356        | 0.023775           |
| INI21002 | Weight                     | 336260 | 6.654                | -0.06087        | 0.02303            |
| INI23116 | Leg fat mass (left)        | 331470 | 6.649                | -0.05468        | 0.020698           |
| INI23112 | Leg fat mass (right)       | 331488 | 6.62                 | -0.05517        | 0.020933           |
| INI21001 | Body mass index (BMI)      | 336144 | 6.498                | -0.06789        | 0.026029           |
| INI23111 | Leg fat percentage (right) | 331491 | 6.341                | -0.04201        | 0.016327           |
| INI23124 | Arm fat mass (left)        | 331362 | 6.317                | -0.06587        | 0.025656           |
| INI23115 | Leg fat percentage (left)  | 331473 | 6.17                 | -0.04087        | 0.016123           |
| INI23119 | Arm fat percentage (right) | 331445 | 5.424                | -0.04689        | 0.019874           |
| INI23123 | Arm fat percentage (left)  | 331395 | 5.048                | -0.04485        | 0.019796           |
| INI49    | Hip circumference          | 336620 | 4.649                | -0.05669        | 0.026205           |
| INI23126 | Arm predicted mass (left)  | 331345 | 4.211                | -0.03373        | 0.016499           |
| INI23125 | Arm fat-free mass (left)   | 331358 | 3.929                | -0.03257        | 0.01658            |
| INI23105 | Basal metabolic rate       | 331502 | 3.923                | -0.03368        | 0.017154           |
| INI23117 | Leg fat-free mass (left)   | 331454 | 3.423                | -0.03063        | 0.016887           |
| INI23118 | Leg predicted mass (left)  | 331449 | 3.336                | -0.02998        | 0.016776           |
| INI23121 | Arm fat-free mass (right)  | 331418 | 3.32                 | -0.02894        | 0.016241           |
| INI23122 | Arm predicted mass (right) | 331413 | 3.176                | -0.02808        | 0.016174           |
| INI23102 | Whole body water mass      | 331510 | 3.044                | -0.02784        | 0.01644            |
| INI23114 | Leg predicted mass (right) | 331480 | 3.019                | -0.02812        | 0.016689           |

**Supplementary Table 4. Phenome-wide association (PheWAS) analysis for rs150090666.**

Summary statistics for a stop-gain variant in *PDE3B* is shown. The same columns are used as in Supplementary Table 3.

| <b>GBE code</b> | <b>Phenotype name</b>                     | <b>N</b> | <b>-log<sub>10</sub><br/>p-value</b> | <b>log(OR)<br/>or BETA</b> | <b>1.96 * SE</b> |
|-----------------|-------------------------------------------|----------|--------------------------------------|----------------------------|------------------|
| HC269           | high cholesterol                          | 43054    | 4.457                                | -0.5904                    | 0.279692         |
| BIN4728         | Leg pain on walking                       | 28151    | 3.154                                | 0.4366                     | 0.252448         |
| BIN2020         | Loneliness, isolation                     | 60153    | 3.098                                | 0.2983                     | 0.174322         |
| INI49           | Hip circumference                         | 336620   | 10.75                                | 0.2476                     | 0.072167         |
| INI23113        | Leg fat-free mass (right)                 | 331480   | 7.381                                | 0.1293                     | 0.046197         |
| INI21002        | Weight                                    | 336260   | 7.333                                | 0.1769                     | 0.063445         |
| INI23114        | Leg predicted mass (right)                | 331480   | 7.3                                  | 0.1276                     | 0.045884         |
| INI23128        | Trunk fat mass                            | 331295   | 7.079                                | 0.1977                     | 0.072304         |
| INI23117        | Leg fat-free mass (left)                  | 331454   | 6.965                                | 0.1259                     | 0.046432         |
| INI23118        | Leg predicted mass (left)                 | 331449   | 6.958                                | 0.1249                     | 0.046119         |
| INI20015        | Sitting height                            | 336513   | 6.783                                | 0.1454                     | 0.054449         |
| INI23105        | Basal metabolic rate                      | 331502   | 6.141                                | 0.1193                     | 0.047177         |
| INI23127        | Trunk fat percentage                      | 331314   | 6.059                                | 0.1641                     | 0.065405         |
| INI50           | Standing height                           | 336500   | 6                                    | 0.1266                     | 0.050725         |
| INI23100        | Whole body fat mass                       | 330970   | 5.895                                | 0.1736                     | 0.070227         |
| INI23120        | Arm fat mass (right)                      | 331422   | 5.601                                | 0.1692                     | 0.070462         |
| INI23124        | Arm fat mass (left)                       | 331362   | 5.255                                | 0.1635                     | 0.070521         |
| INI23102        | Whole body water mass                     | 331510   | 5.107                                | 0.1031                     | 0.045198         |
| INI23101        | Whole body fat-free mass                  | 331486   | 5.039                                | 0.1021                     | 0.045119         |
| INI23099        | Body fat percentage                       | 331318   | 4.919                                | 0.1217                     | 0.054508         |
| INI23123        | Arm fat percentage (left)                 | 331395   | 4.516                                | 0.1158                     | 0.054429         |
| INI23119        | Arm fat percentage (right)                | 331445   | 4.401                                | 0.1146                     | 0.054645         |
| INI23116        | Leg fat mass (left)                       | 331470   | 4.208                                | 0.1163                     | 0.056918         |
| INI23126        | Arm predicted mass (left)                 | 331345   | 4.189                                | 0.09246                    | 0.045374         |
| INI23112        | Leg fat mass (right)                      | 331488   | 4.119                                | 0.1162                     | 0.057565         |
| INI23125        | Arm fat-free mass (left)                  | 331358   | 4.061                                | 0.09128                    | 0.04559          |
| INI23122        | Arm predicted mass (right)                | 331413   | 3.746                                | 0.085                      | 0.044472         |
| INI3062         | Forced vital capacity (FVC)               | 309028   | 3.572                                | 0.1001                     | 0.053841         |
| INI23130        | Trunk predicted mass                      | 331203   | 3.565                                | 0.08357                    | 0.045002         |
| INI23129        | Trunk fat-free mass                       | 331234   | 3.508                                | 0.08307                    | 0.045158         |
| INI23121        | Arm fat-free mass (right)                 | 331418   | 3.326                                | 0.07965                    | 0.044649         |
| INI20151        | Forced vital capacity (FVC), Best measure | 255494   | 3.243                                | 0.102                      | 0.058016         |

**Supplementary Table 5. Genetic correlation of summary statistics with different covariates.**

For five binary traits and five quantitative traits (type), genetic correlation is computed for two GWAS summary statistics computed with four and ten genotype principal components in the covariates. The phenotype name and its corresponding global biobank engine code (GBE code) are shown.

| Type       | GBE code      | Phenotype name              | Genetic correlation |
|------------|---------------|-----------------------------|---------------------|
| Binary     | HC382         | Asthma                      | 1.0003              |
| Binary     | HC259         | High cholesterol            | 0.9973              |
| Binary     | cancer1003    | Skin cancer                 | 0.9992              |
| Binary     | FH1065        | High blood pressure         | 1.0                 |
| Binary     | MED1140884600 | Metformin                   | 0.9994              |
| Continuous | INI21001      | BMI                         | 1.0                 |
| Continuous | INI50         | Standing height             | 1.0                 |
| Continuous | INI3062       | Forced vital capacity (FVC) | 1.0                 |
| Continuous | INI30120      | Lymphocyte count            | 1.0                 |
| Continuous | INI3786       | Age asthma diagnosed        | 1.0                 |

## Supplementary References

1. DeBoever, C. *et al.* Medical relevance of protein-truncating variants across 337,205 individuals in the UK Biobank study. *Nat. Commun.* **9**, 1612 (2018).
